# Supplementary material for: Novel ligands from direct benzylic functionalisation of tris(2-pyridylmethyl)amine
Source: Royal Society of Chemistry journal article supplement (doi:10.1039/d4dt02022g), 2024-01-01

Supplementary Information for

## Novel Ligands from Direct Benzylic Functionalisation of Tris(2-pyridylmethyl)amine

Paolo Zardi,<sup>b</sup> Justyna Piekos,<sup>a</sup> Carlo Bravin,<sup>a</sup> Klaus Wurst,<sup>c</sup> Federico Droghetti,<sup>d</sup> Mirco Natali,<sup>d</sup> Giulia Licini,<sup>a,e</sup> Alfonso Zambon,<sup>b,\*</sup> and Cristiano Zonta<sup>a,e,\*</sup>

<sup>a</sup>*Dipartimento di Scienze Chimiche, Università di Padova, via Marzolo 1, 35131 Padova, Italy*

<sup>b</sup>*Dipartimento di Scienze Chimiche e Geologiche, Università di Modena e Reggio Emilia, via Campi 103, 41125, Modena, Italy*

<sup>c</sup>*Department of General, Inorganic and Theoretical Chemistry University of Innsbruck A-6020 Innsbruck, Austria*

<sup>d</sup>*Dipartimento di Scienze Chimiche, Farmaceutiche ed Agrarie, Università di Ferrara, via L. Borsari 46, 44121 Ferrara, Italy*

<sup>e</sup>*CIRCC Interuniversity Consortium Chemical Reactivity and Catalysis, Via Celso Ulpiani 27, 70126 Bari, Italy*

### Summary

|                                                   |    |
|---------------------------------------------------|----|
| <b>1. H/D exchange experiment</b> .....           | 2  |
| <b>2. TPMA ligands characterization</b> .....     | 4  |
| <b>3. Zinc complexes characterization</b> .....   | 13 |
| <b>4. Cobalt complexes characterization</b> ..... | 16 |
| <b>5. NMR spectra</b> .....                       | 19 |

## 1. H/D exchange experiment

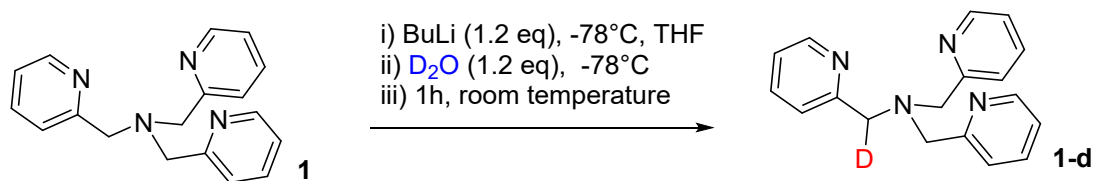

Under argon atmosphere, **1** (100 mg, 0.34 mmol) was dissolved in dry THF (3.5 ml) in a Schlenk flask. After cooling at -78°C, BuLi 2.5 M in hexanes was added (0.165 ml, 0.41 mmol) and the solution was stirred for 30 min. Then, D<sub>2</sub>O (7.0 μl, 0.41 mmol) was added and the solution was stirred for 1 h. The reaction was quenched with a saturated NH<sub>4</sub>Cl aqueous solution. The solvent was removed under reduced pressure. The resulting brown oil was dissolved in CH<sub>2</sub>Cl<sub>2</sub> (10 mL) and the solution washed with a saturated NH<sub>4</sub>Cl aqueous solution (3×5 ml). The organic phase was dried over MgSO<sub>4</sub> and evaporated to dryness. The resulting yellow oil was precipitated by crystallization from THF/hexane to give a yellow solid (97.0 mg, 97 %).

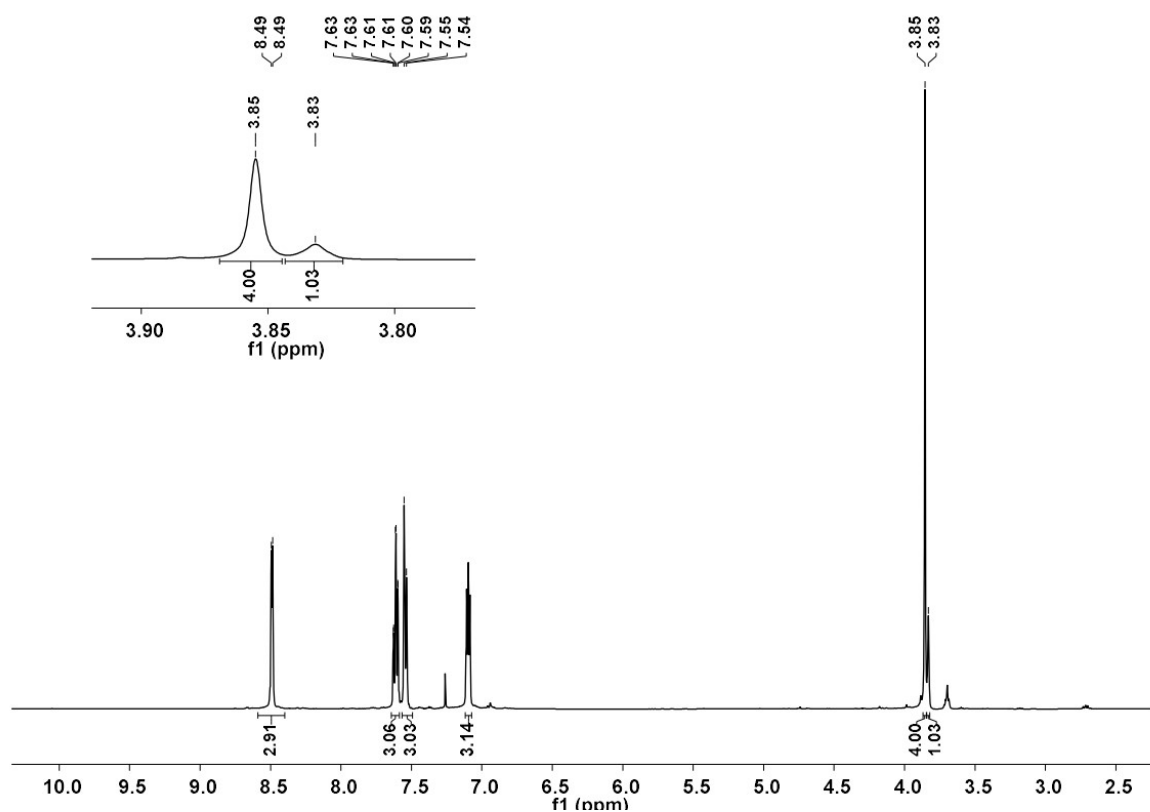

Figure S1. <sup>1</sup>H NMR spectrum of **1-d**.

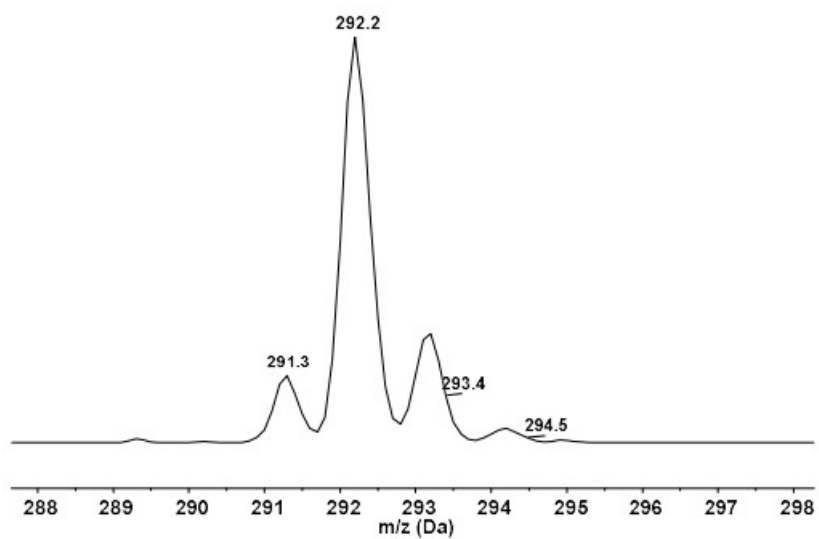

**Figure S2.** ESI-MS spectrum of 1-d. Calcd for  $C_{18}H_{18}N_4D$  [M+1] 292.1667

## 2. TPMA ligands characterization

2a

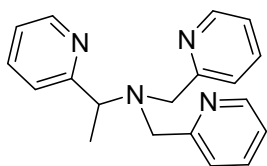

$^1\text{H}$  NMR (400 MHz,  $\text{CDCl}_3$ )  $\delta$  8.56 (ddd,  $J = 4.9, 1.9, 0.9$  Hz, 1H), 8.48 (ddd,  $J = 4.9, 1.8, 0.9$  Hz, 2H), 7.63 (m, 3H), 7.55 (d,  $J = 7.9$  Hz, 2H), 7.49 (d,  $J = 7.9$  Hz, 1H), 7.12 (m, 3H), 4.08 (q,  $J = 6.8$  Hz, 1H), 3.99 (d,  $J = 15.0$  Hz, 2H), 3.78 (d,  $J = 14.9$  Hz, 2H), 1.55 (d,  $J = 6.8$  Hz, 3H).

$^{13}\text{C}$  NMR (150 MHz,  $\text{CDCl}_3$ )  $\delta$  161.97 (C), 160.52 (C), 149.01 (CH), 148.99 (CH), 136.50 (CH), 136.23 (CH), 123.07 (CH), 122.85 (CH), 122.05 (CH), 121.94 (CH), 60.33 (CH), 56.78 ( $\text{CH}_2$ ), 14.57 ( $\text{CH}_3$ ).

HRMS (ESI): calcd for  $\text{C}_{19}\text{H}_{21}\text{N}_4$   $[\text{M}+\text{H}]^+$  305.1761, found 305.1763.

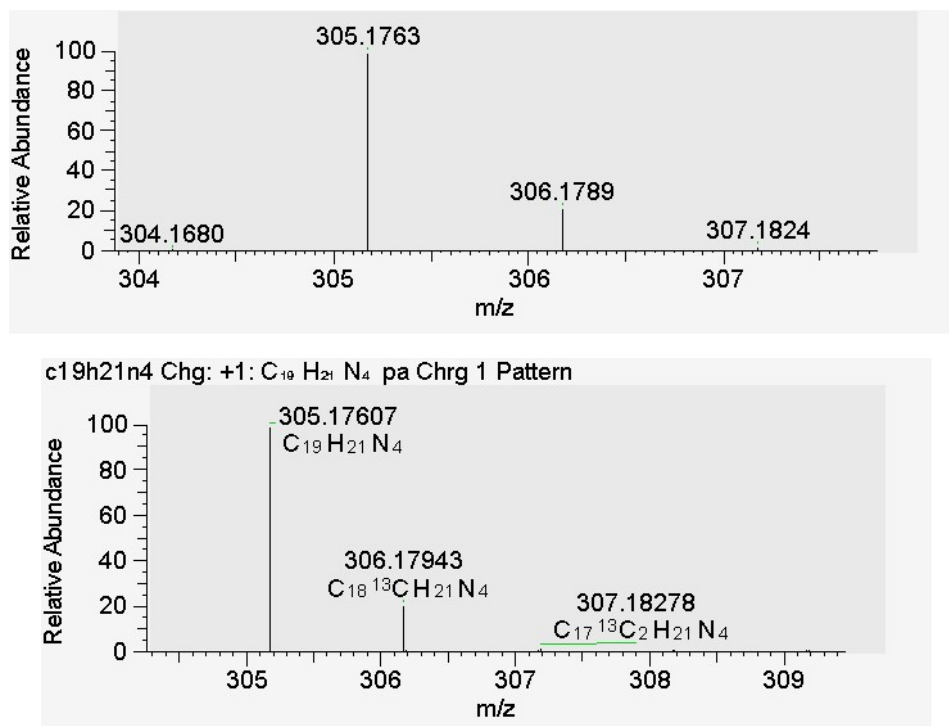

Figure S3. Experimental (top) and simulated (bottom) HR ESI-MS spectrum of 2a.

2b

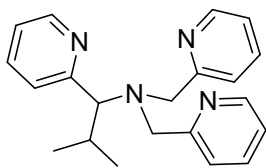

$^1\text{H}$  NMR (600 MHz,  $\text{CDCl}_3$ )  $\delta$  8.67 (d,  $J = 4.8$  Hz, 1H), 8.51 (d,  $J = 4.8$  Hz, 2H), 7.66 (m, 5H), 7.17 (ddd,  $J = 7.6, 4.8, 1.2$  Hz, 1H), 7.13 (m, 3H), 4.11 (d,  $J = 15.0$  Hz, 2H), 3.43 (d,  $J = 15.0$  Hz, 2H), 3.23 (d,  $J = 10.7$  Hz, 1H), 2.69 (m, 1H), 1.23 (d,  $J = 6.6$  Hz, 3H), 0.61 (d,  $J = 6.5$  Hz, 3H).

$^{13}\text{C}$  NMR (100 MHz,  $\text{CDCl}_3$ )  $\delta$  160.63 (C), 157.38 (C), 149.21 (CH), 148.79 (CH), 136.21 (CH), 135.45 (CH), 125.12 (CH), 122.71 (CH), 121.76 (CH), 121.66 (CH), 70.95 (CH), 56.45 ( $\text{CH}_2$ ), 28.00 (CH), 20.62 ( $\text{CH}_3$ ), 20.54 ( $\text{CH}_3$ ).

HRMS (ESI): calcd for  $\text{C}_{21}\text{H}_{25}\text{N}_4$   $[\text{M}+\text{H}]^+$  333.2074, found 333.2071.

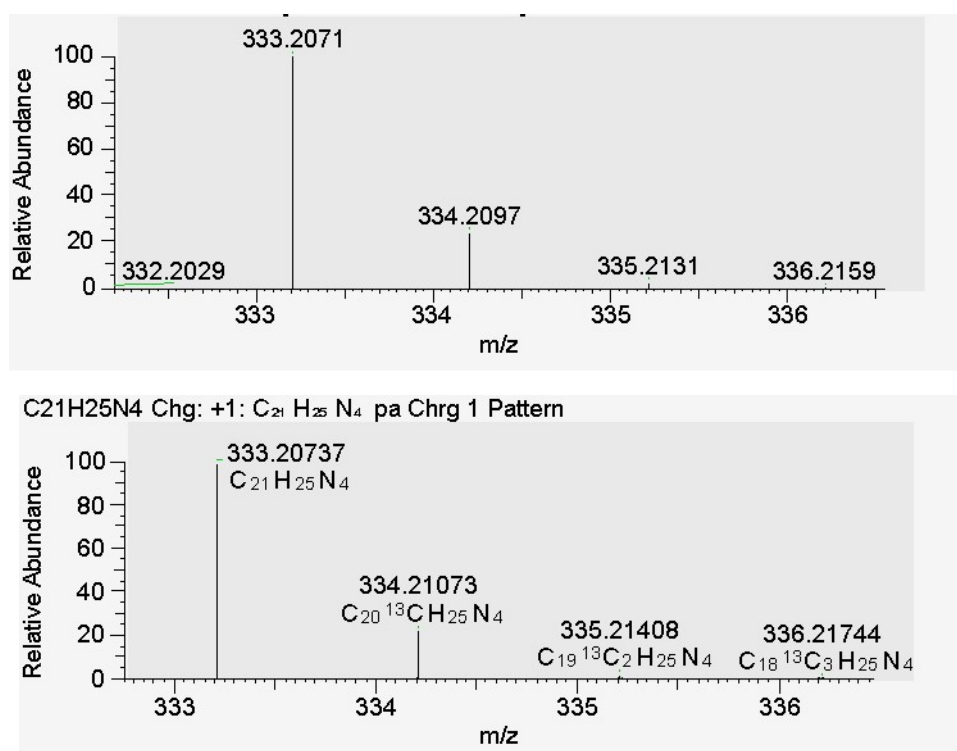

Figure S4. Experimental (top) and simulated (bottom) HR ESI-MS spectrum of 2b.

2c

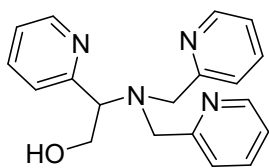

$^1\text{H}$  NMR (600 MHz,  $\text{CDCl}_3$ )  $\delta$  8.59 (d,  $J = 4.9$  Hz, 1H), 8.51 (d,  $J = 4.9$  Hz, 2H), 7.67 (td,  $J = 7.7, 1.8$  Hz, 1H), 7.51 (td,  $J = 7.7, 1.6$  Hz, 2H), 7.32 (d,  $J = 7.8$  Hz, 1H), 7.27 (d,  $J = 7.8$  Hz, 2H), 7.20 (ddd,  $J = 7.5, 4.8, 0.9$  Hz, 1H), 7.09 (m, 2H), 4.31 (m, 1H), 4.29 (d,  $J = 15.4$  Hz, 2H), 4.16 (dd,  $J = 9.2, 4.9$  Hz, 1H), 3.96 (dd,  $J = 12.0, 4.9$  Hz, 1H), 3.84 (d,  $J = 15.2$  Hz, 2H).

$^{13}\text{C}$  NMR (150 MHz,  $\text{CDCl}_3$ )  $\delta$  160.07 (C), 159.06 (C), 149.33 (CH), 148.91 (CH), 136.64 (CH), 136.43 (CH), 123.71 (CH), 123.20 (CH), 122.55 (CH), 122.07 (CH), 67.04 (CH), 61.84 ( $\text{CH}_2$ ), 57.02 ( $\text{CH}_2$ ).

HRMS (ESI): calcd for  $\text{C}_{19}\text{H}_{21}\text{N}_4\text{O}$   $[\text{M}+\text{H}]^+$  321.1710, found 321.1706.

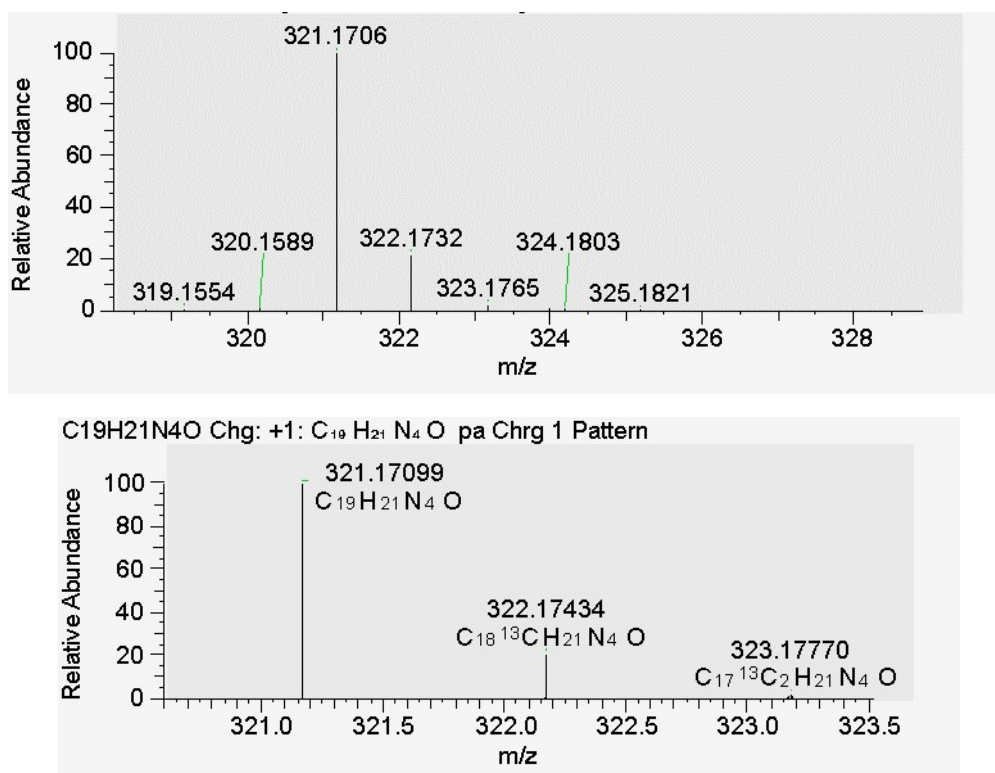

Figure S5. Experimental (top) and simulated (bottom) HR ESI-MS spectrum of 2c.



2e

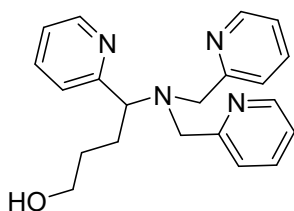

<sup>1</sup>H NMR (400 MHz, CDCl<sub>3</sub>) δ 8.59 (d, *J* = 4.9 Hz, 1H), 8.49 (d, *J* = 4.9 Hz, 2H), 7.66 (td, *J* = 7.7, 1.9 Hz, 1H), 7.60 (td, *J* = 7.6, 1.8 Hz, 2H), 7.43 (d, *J* = 7.9 Hz, 2H), 7.34 (d, *J* = 7.8 Hz, 1H), 7.17 (ddd, *J* = 7.6, 4.9, 1.2 Hz, 1H), 7.12 (ddd, *J* = 7.5, 4.9, 1.2 Hz, 2H), 4.06 (d, *J* = 14.6 Hz, 2H), 3.92 (t, *J* = 7.0 Hz, 1H), 3.66 (d, *J* = 15.0 Hz, 2H), 3.65 (m, 1H), 3.55 (m, 1H), 2.34 (m, 1H), 2.11 (m, 1H), 1.61 (m, 2H).

<sup>13</sup>C NMR (100 MHz, CDCl<sub>3</sub>) δ 159.85 (C), 159.55 (C), 149.10 (CH), 148.90 (CH), 136.64 (CH), 136.24 (CH), 124.50 (CH), 123.46 (CH), 122.37 (CH), 122.13 (CH), 64.42 (CH<sub>2</sub>), 61.73 (CH), 56.71 (CH<sub>2</sub>), 30.06 (CH<sub>2</sub>), 25.56 (CH<sub>2</sub>).

HRMS (ESI): calcd for C<sub>21</sub>H<sub>25</sub>N<sub>4</sub>O [M+H]<sup>+</sup> 349.2023, found 349.2014.

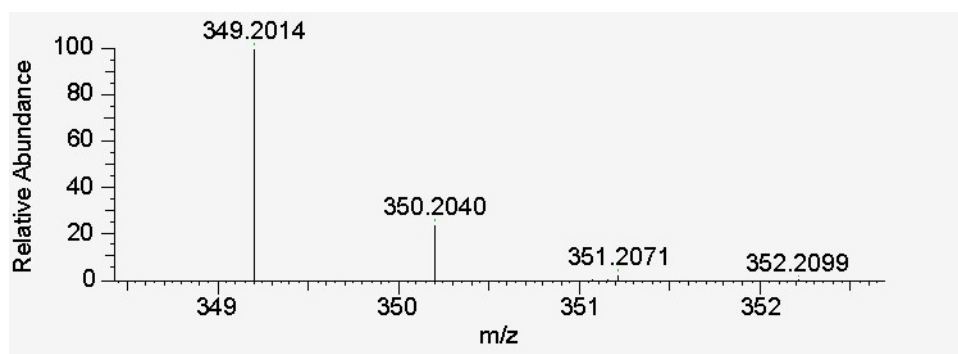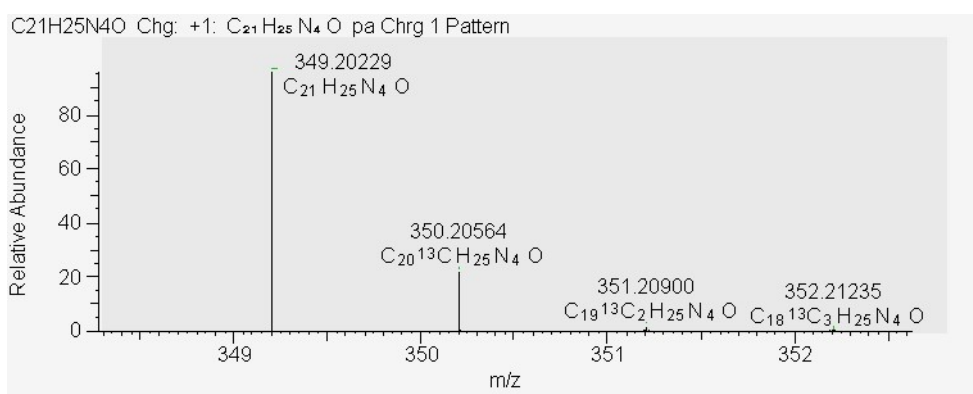

Figure S7. Experimental (top) and simulated (bottom) HR ESI-MS spectrum of 2e.



2f

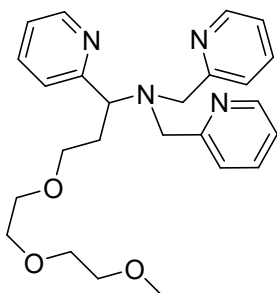

$^1\text{H}$  NMR (400 MHz,  $\text{CDCl}_3$ )  $\delta$  8.60 (d,  $J = 4.9$  Hz, 1H), 8.48 (d,  $J = 4.9$  Hz, 2H), 7.64 (m, 3H), 7.55 (d,  $J = 7.8$  Hz, 2H), 7.25 (d,  $J = 7.5$  Hz, 1H), 7.16 (ddd,  $J = 7.6, 4.8, 1.2$  Hz, 1H), 7.11 (ddd,  $J = 7.4, 4.9, 1.3$  Hz, 2H), 4.07 (d,  $J = 15.0$  Hz, 2H), 3.97 (t,  $J = 7.3$  Hz, 1H), 3.59 (d,  $J = 15.2$  Hz, 2H), 3.57 – 3.40 (m, 10H), 3.35 (s, 3H), 2.37 (m, 2H).

$^{13}\text{C}$  NMR (101 MHz,  $\text{CDCl}_3$ )  $\delta$  160.63 (C), 158.50 (C), 149.22 (CH), 148.93 (CH), 136.50 (CH), 135.99 (CH), 124.73 (CH), 122.95 (CH), 122.27 (CH), 121.92 (CH), 72.05 ( $\text{CH}_3$ ), 70.66 ( $\text{CH}_2$ ), 70.63 ( $\text{CH}_2$ ), 70.07 ( $\text{CH}_2$ ), 68.82 ( $\text{CH}_2$ ), 61.05 (CH), 59.15 ( $\text{CH}_2$ ), 56.78 ( $\text{CH}_2$ ), 30.60 ( $\text{CH}_2$ ).

HRMS (ESI): calcd for  $\text{C}_{25}\text{H}_{33}\text{N}_4\text{O}_3$   $[\text{M}+\text{H}]^+$  437.2547, found 437.2547.

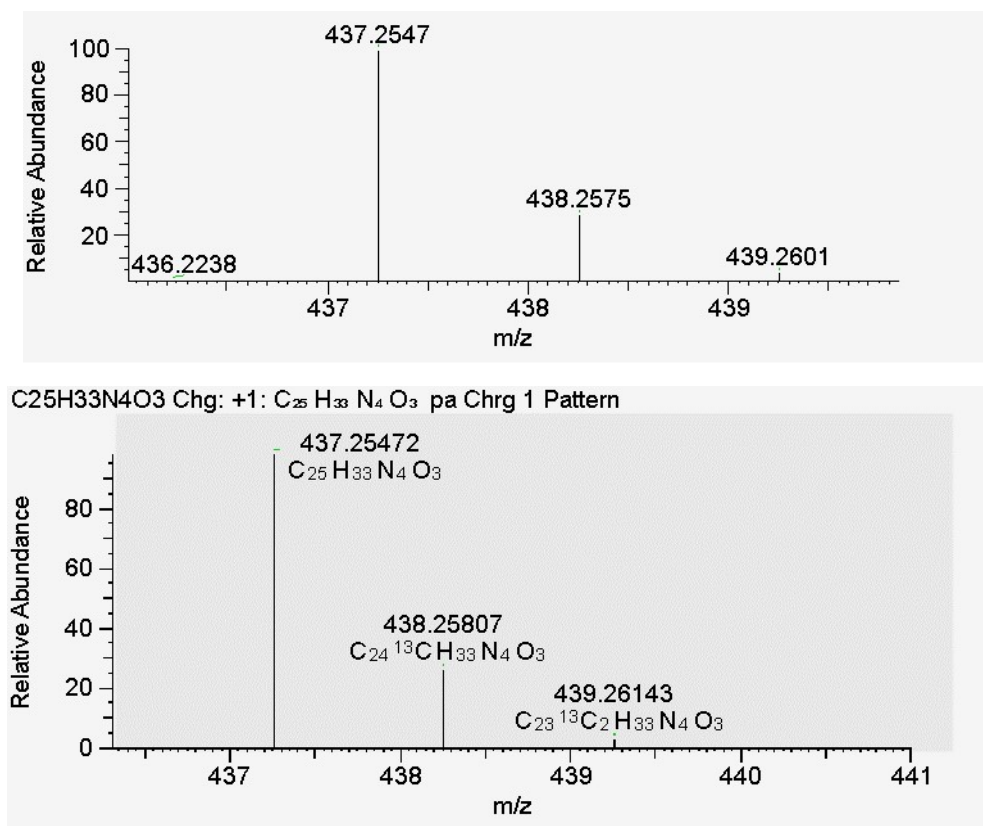

Figure S8. Experimental (top) and simulated (bottom) HR ESI-MS spectrum of 2f.

2g

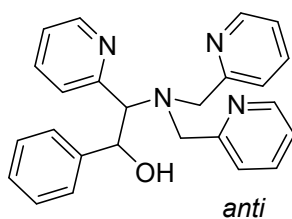

$^1\text{H}$  NMR (600 MHz,  $\text{CDCl}_3$ )  $\delta$  8.63 (d,  $J = 4.8$  Hz, 1H), 8.54 (d,  $J = 4.9$  Hz, 2H), 7.54 (td,  $J = 7.6, 1.8$  Hz, 2H), 7.44 (td,  $J = 7.6, 1.9$  Hz, 1H), 7.33 (d,  $J = 7.8$  Hz, 2H), 7.17 – 7.04 (m, 8H), 6.77 (d,  $J = 7.8$  Hz, 1H), 5.55 (d,  $J = 9.6$  Hz, 1H), 4.45 (d,  $J = 15.0$  Hz, 2H), 3.85 (d,  $J = 9.6$  Hz, 1H), 3.65 (d,  $J = 15.0$  Hz, 2H).

$^{13}\text{C}$  NMR (150 MHz,  $\text{CDCl}_3$ )  $\delta$  160.03 (C), 157.11 (C), 149.17 (CH), 148.98 (CH), 148.96 (CH), 142.11 (C), 136.60 (CH), 135.84 (CH), 127.83 (CH), 127.41 (CH), 127.09 (CH), 125.40 (CH), 123.34 (CH), 122.38 (CH), 122.07 (CH), 72.58 (CH), 72.25 (CH), 57.11 ( $\text{CH}_2$ ).

HRMS (ESI): calcd for  $\text{C}_{25}\text{H}_{25}\text{N}_4\text{O}_3$   $[\text{M}+\text{H}]^+$  397.2023, found 397.2014.

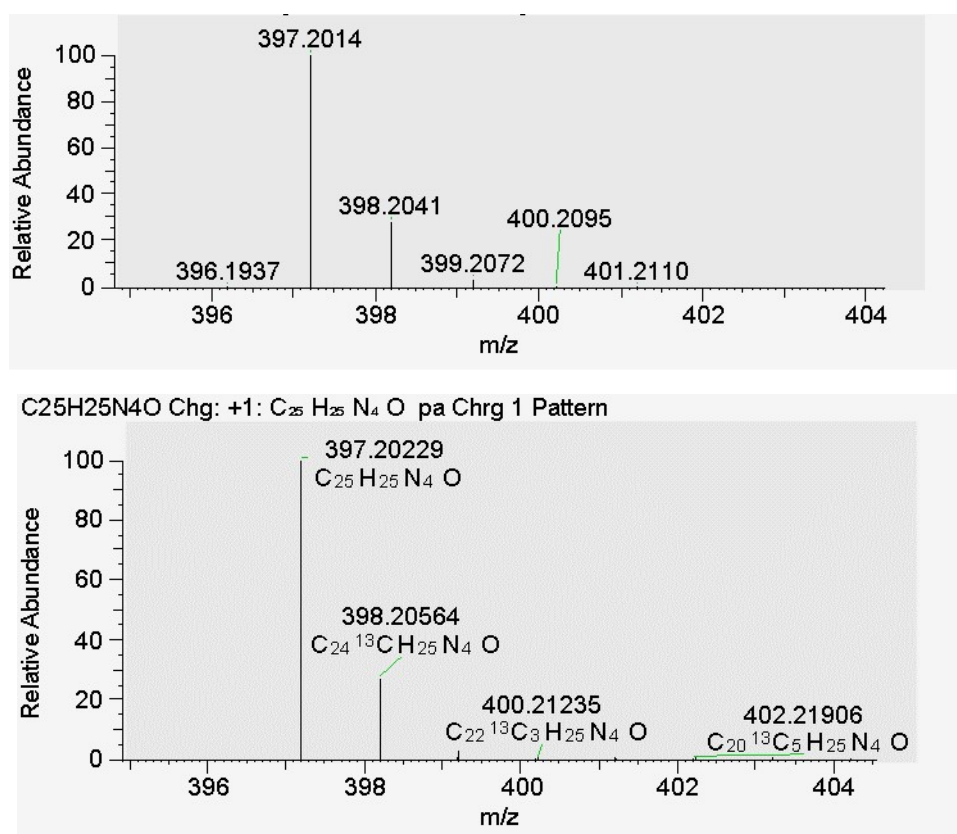

Figure S9. Experimental (top) and simulated (bottom) HR ESI-MS spectrum of 2g.

2h

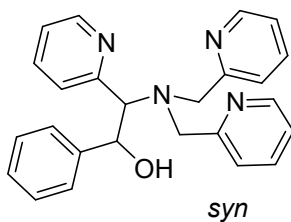

$^1\text{H}$  NMR (400 MHz,  $\text{CDCl}_3$ )  $\delta$  8.58 (d,  $J = 4.9$  Hz, 1H), 8.50 (d,  $J = 4.8$  Hz, 2H), 7.66 (td,  $J = 7.7, 1.8$  Hz, 1H), 7.54 (td,  $J = 7.7, 1.8$  Hz, 2H), 7.38 (d,  $J = 7.9$  Hz, 1H), 7.22 (m, 6H), 7.13 (m, 4H), 5.62 (d,  $J = 6.2$  Hz, 1H), 4.17 (d,  $J = 15.1$  Hz, 2H), 4.07 (d,  $J = 6.3$  Hz, 1H), 3.66 (d,  $J = 15.1$  Hz, 2H).

$^{13}\text{C}$  NMR (101 MHz,  $\text{CDCl}_3$ )  $\delta$  159.76 (C), 157.84 (C), 148.69 (CH), 148.56 (CH), 142.98 (C), 136.77 (CH), 136.69 (CH), 128.04 (CH), 127.28 (CH), 127.15 (CH), 126.41 (CH), 123.21 (CH), 122.69 (CH), 122.15 (CH), 74.28 (CH), 68.89 (CH), 57.42 ( $\text{CH}_2$ ).

HRMS (ESI): calcd for  $\text{C}_{25}\text{H}_{25}\text{N}_4\text{O}_3$   $[\text{M}+\text{H}]^+$  397.2023, found 397.2019.

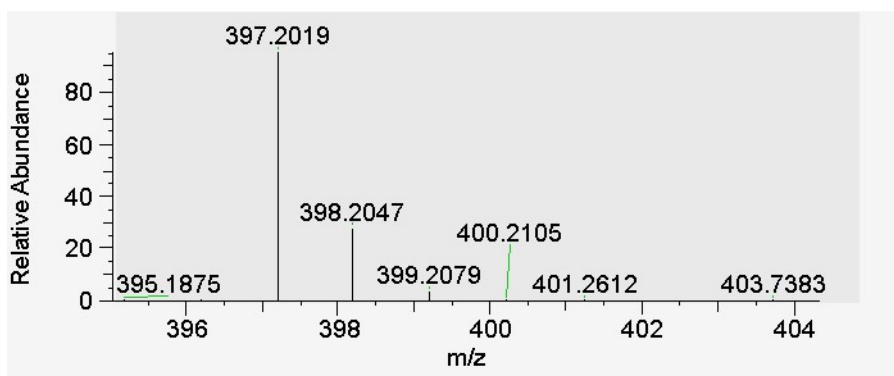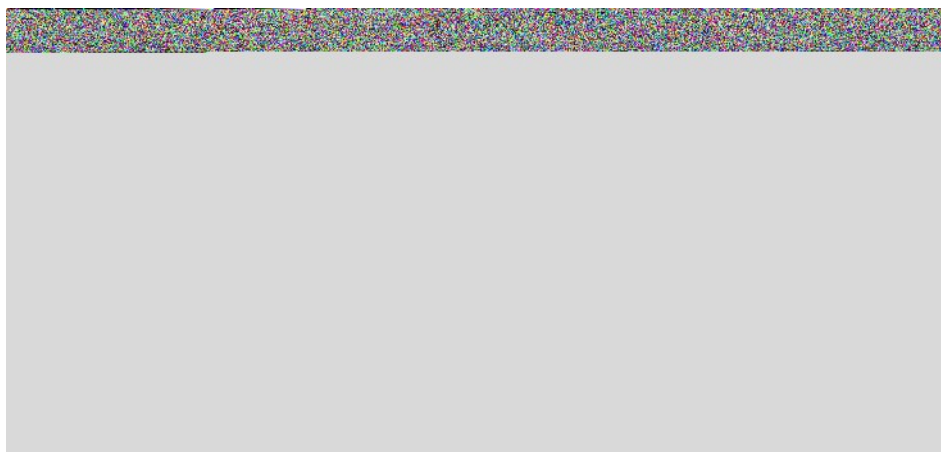

**Figure S10.** Experimental (top) and simulated (bottom) HR ESI-MS spectrum of **2h**.

21

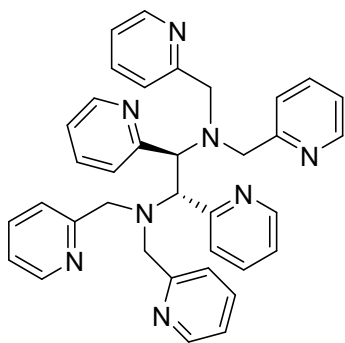

$^1\text{H}$  NMR (400 MHz,  $\text{CDCl}_3$ )  $\delta$  8.68 (d,  $J = 4.6$  Hz, m, 2H), 8.39 (d,  $J = 4.8$  Hz, m, 4H), 7.61 (td,  $J = 7.6, 1.9$  Hz, 2H), 7.44 (td,  $J = 7.7, 1.8$  Hz, 4H), 7.26 (m, 2H), 7.12 (d,  $J = 7.6$  Hz, 2H), 7.05 (dd,  $J = 6.6, 5.1$  Hz, 4H), 6.79 (d,  $J = 7.9$  Hz, 4H), 4.89 (s, 2H), 3.95 (d,  $J = 15.2$  Hz, 4H), 3.45 (d,  $J = 15.2$  Hz, 4H).

$^{13}\text{C}$  NMR (101 MHz,  $\text{CDCl}_3$ )  $\delta$  160.12 (C), 157.07 (C), 149.17 (CH), 148.47 (CH), 136.31 (CH), 135.60 (CH), 125.77 (CH), 123.09 (CH), 122.14 (CH), 121.87 (CH), 64.81 (CH), 57.28 ( $\text{CH}_2$ ).

HRMS (ESI): calcd for  $\text{C}_{36}\text{H}_{35}\text{N}_8$   $[\text{M}+\text{H}]^+$  579.2979, found 579.2969. Calcd for  $\text{C}_{36}\text{H}_{36}\text{N}_8$   $[\text{M}+2\text{H}]^{2+}$  290.1526, found 290.1520.

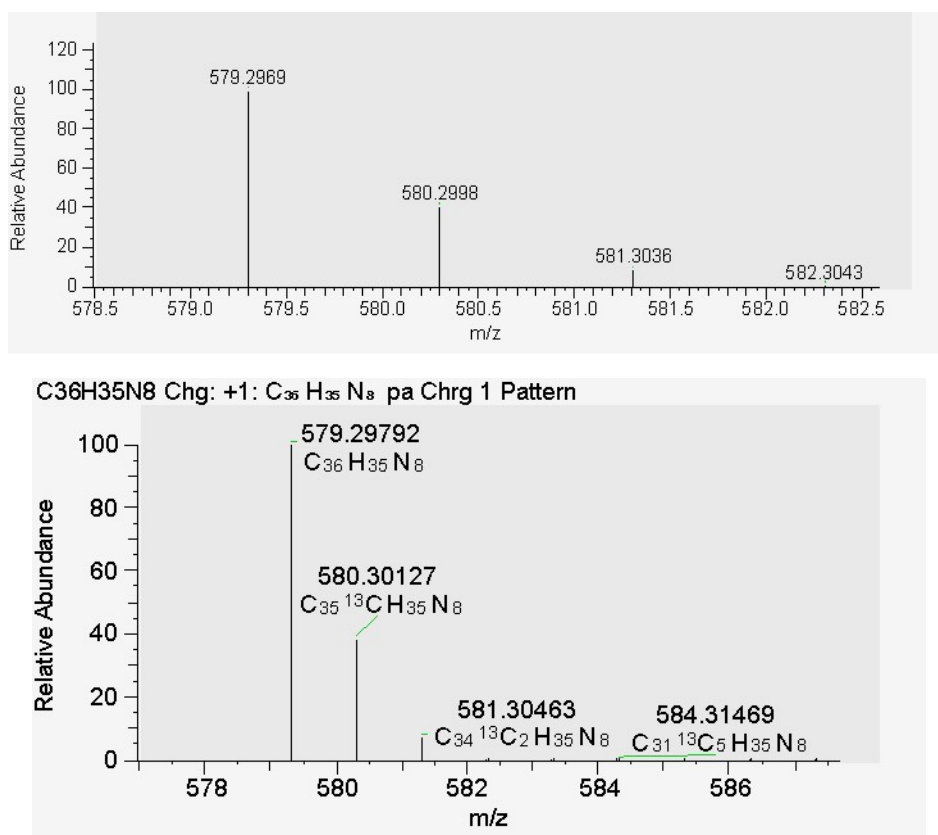

Figure S11. Experimental (top) and simulated (bottom) HR ESI-MS spectrum of 21.

### 3. Zinc complexes characterization

3c

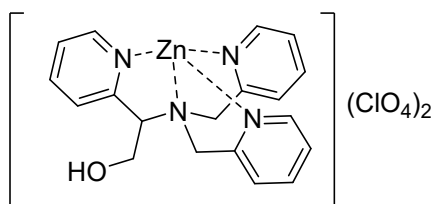

$^1\text{H}$  NMR (600 MHz,  $\text{DMSO-}d_6$ )  $\delta$  8.69 (d,  $J = 5.3$  Hz, 1H), 8.61 (d,  $J = 5.3$  Hz, 1H), 8.59 (d,  $J = 5.3$  Hz, 1H), 8.15 (td,  $J = 7.8, 1.7$  Hz, 1H), 8.03 (dt,  $J = 7.8, 4.7$  Hz, 1H), 7.91 (t,  $J = 7.3$  Hz, 1H), 7.81 (d,  $J = 8.0$  Hz, 1H), 7.65 (t,  $J = 6.4$  Hz, 1H), 7.57 (d,  $J = 7.5$  Hz, 2H), 7.48 (t,  $J = 6.4$  Hz, 1H), 7.38 (d,  $J = 7.9$  Hz, 1H), 5.70 (s, 1H), 4.60 (d,  $J = 16.8$  Hz, 1H), 4.48 (d,  $J = 16.9$  Hz, 1H), 4.40 (m, 2H), 4.34 (d,  $J = 17.5$  Hz, 1H), 4.25 (m, 1H), 4.20 (d,  $J = 17.6$  Hz, 1H).

$^{13}\text{C}$  NMR (151 MHz,  $\text{DMSO-}d_6$ )  $\delta$  155.54 (C), 154.81 (C), 154.54 (C), 147.69 (CH), 147.25 (2 CH), 140.93 (CH), 140.73 (CH), 140.33 (CH), 124.98 (CH), 124.89 (CH), 124.63 (CH), 124.50 (CH), 124.38 (CH), 123.83 (CH), 66.78 (CH), 59.43 (CH<sub>2</sub>), 58.92 (CH<sub>2</sub>), 54.71 (CH<sub>2</sub>).

HRMS (ESI): calcd for  $\text{C}_{20}\text{H}_{21}\text{N}_4\text{O}_3\text{Zn}$  [ $\text{M} - 2 \text{ClO}_4 + \text{HCOO}$ ] $^+$  429.0900, found 429.0897

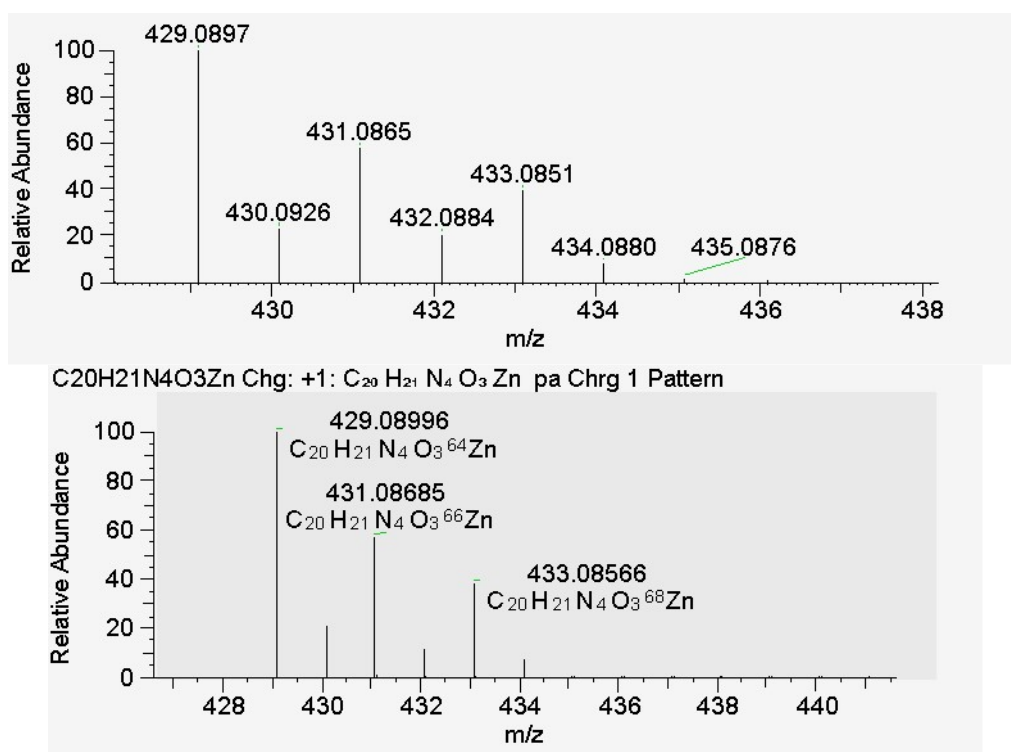

Figure S12. Experimental (top) and simulated (bottom) HR ESI-MS spectrum of 3c.

3d

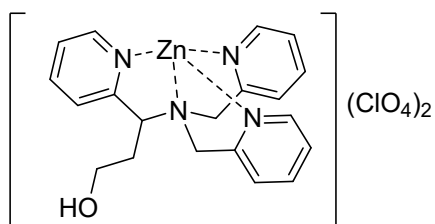

$^1\text{H}$  NMR (600 MHz,  $\text{DMSO-}d_6$ )  $\delta$  8.70 (d,  $J = 5.2$  Hz, 1H), 8.60 (br, 1H), 8.14 (td,  $J = 7.8, 1.7$  Hz, 1H), 8.04 (td,  $J = 7.7, 1.6$  Hz, 1H), 7.89 (t,  $J = 7.6$  Hz, 1H), 7.80 (d,  $J = 8.1$  Hz, 1H), 7.63 (t,  $J = 6.5$  Hz, 1H), 7.56 (m, 2H), 7.46 (t,  $J = 6.5$  Hz, 1H), 7.33 (d,  $J = 7.9$  Hz, 1H), 5.19 (br, 1H), 4.46 (m, 3H), 4.16 (m, 2H), 3.80 (m, 1H), 3.67 (m, 1H), 2.44 (m, 1H), 2.35 (m, 1H).

$^{13}\text{C}$  NMR (151 MHz,  $\text{DMSO-}d_6$ )  $\delta$  156.78 (C), 154.64 (C), 154.31 (C), 147.99 (CH), 147.21 (2CH), 141.09 (CH), 140.75 (CH), 140.22 (CH), 124.94 (CH), 124.91 (CH), 124.57 (CH), 124.30 (CH), 123.96 (CH), 123.70 (CH), 63.44 (CH), 58.73 (CH<sub>2</sub>), 58.31 (CH<sub>2</sub>), 54.18 (CH<sub>2</sub>), 30.42 (CH<sub>2</sub>).

HRMS (ESI): calcd for  $\text{C}_{21}\text{H}_{23}\text{N}_4\text{O}_3\text{Zn}$  [ $\text{M} - 2 \text{ClO}_4 + \text{HCOO}$ ] $^+$  443.1056, found 443.1053.

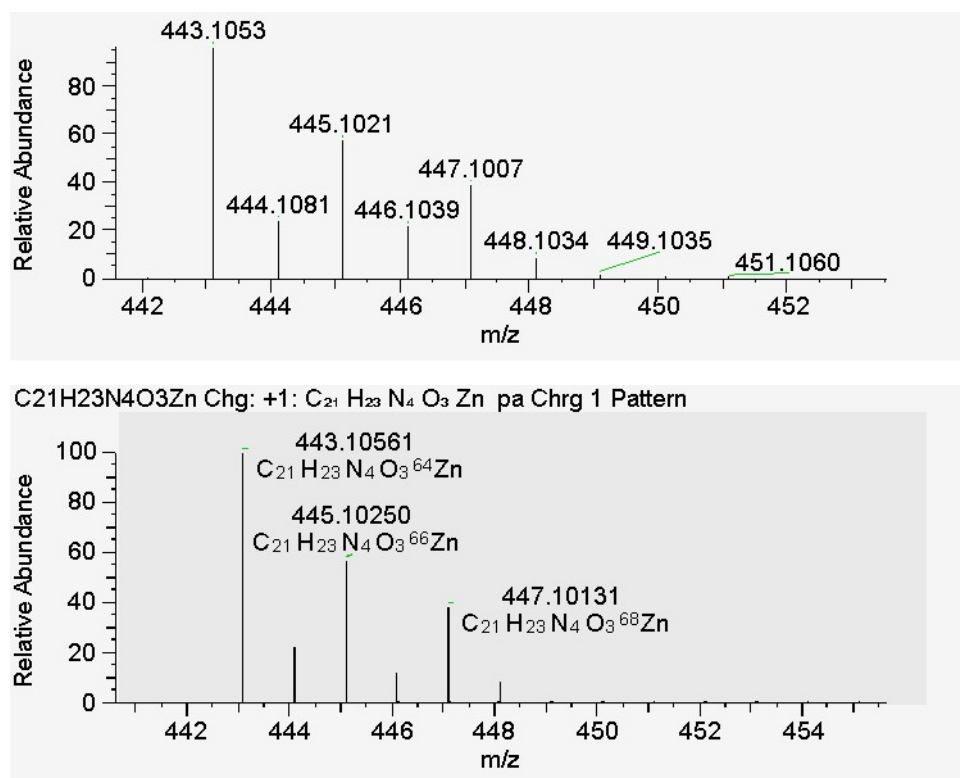

Figure S13. Experimental (top) and simulated (bottom) HR ESI-MS spectrum of 3d

3e

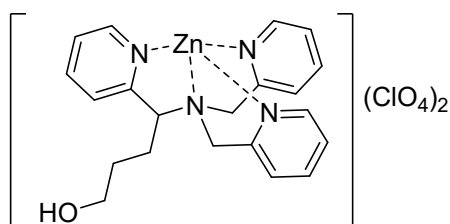

$^1\text{H}$  NMR (400 MHz,  $\text{DMSO-}d_6$ )  $\delta$  8.72 (d,  $J = 5.2$  Hz, 1H), 8.61 (br, 2H), 8.15 (td,  $J = 7.8, 1.8$  Hz, 1H), 8.05 (td,  $J = 7.7, 1.7$  Hz, 1H), 7.88 (td,  $J = 7.7, 1.7$  Hz, 1H), 7.77 (d,  $J = 8.0$  Hz, 1H), 7.64 (dd,  $J = 7.6, 5.2$  Hz, 1H), 7.58 (m, 2H), 7.46 (m, 1H), 7.32 (d,  $J = 8.0$  Hz, 1H), 4.72 (t,  $J = 4.7$  Hz, 1H), 4.55 (d,  $J = 16.5$  Hz, 1H), 4.45 (d,  $J = 16.7$  Hz, 1H), 4.26 (dd,  $J = 8.8, 3.7$  Hz, 1H), 3.59 (m, 2H), 2.25 (m, 2H), 1.76 (p,  $J = 6.3$  Hz, 2H).

$^{13}\text{C}$  NMR (101 MHz,  $\text{DMSO-}d_6\text{O}$ )  $\delta$  156.85 (C), 154.74 (C), 154.36 (C), 148.11 (CH), 147.31 (CH), 147.25 (CH), 141.13 (CH), 140.79 (CH), 140.24 (CH), 124.99 (CH), 124.91 (CH), 124.67 (CH), 124.28 (CH), 124.05 (CH), 123.66 (CH), 66.40 (CH), 60.57 ( $\text{CH}_2$ ), 58.73 ( $\text{CH}_2$ ), 53.79 ( $\text{CH}_2$ ), 30.35 ( $\text{CH}_2$ ), 24.32 ( $\text{CH}_2$ ).

HRMS (ESI): calcd for  $\text{C}_{22}\text{H}_{25}\text{N}_4\text{O}_3\text{Zn}$  [ $\text{M} - 2 \text{ClO}_4 + \text{HCOO}$ ] $^+$  457.1213, found 457.1206.

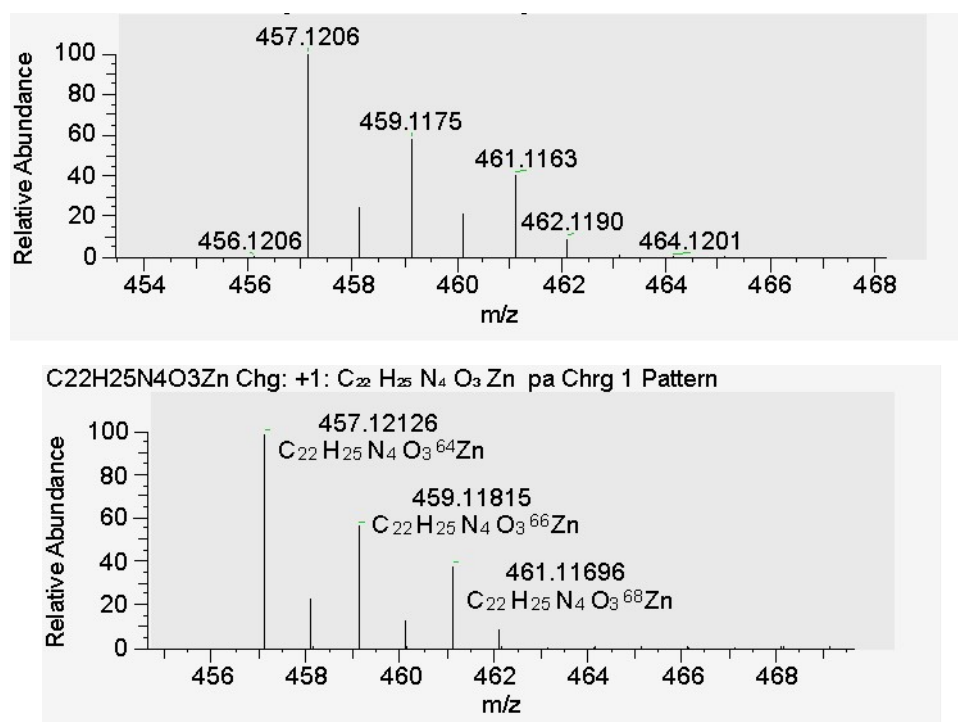

Figure S14. Experimental (top) and simulated (bottom) HR ESI-MS spectrum of 3e

## 4. Cobalt complexes characterization

4c

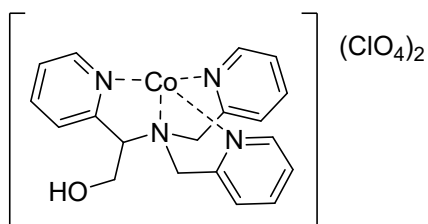

Elemental analysis: calcd. for  $\text{C}_{19}\text{H}_{20}\text{N}_4\text{O}_9\text{Cl}_2\text{Co}\cdot\text{H}_2\text{O}\cdot 0.5 \text{CH}_3\text{CN}$ : C, 38.95; H, 3.84; N, 10.22. Found: C, 39.10; H, 3.81; N, 10.03.

HRMS (ESI): calcd for  $\text{C}_{19}\text{H}_{20}\text{N}_4\text{O}_5\text{ClCo}$   $[\text{M} - \text{ClO}_4]^+$  478.0449, found 478.0447.

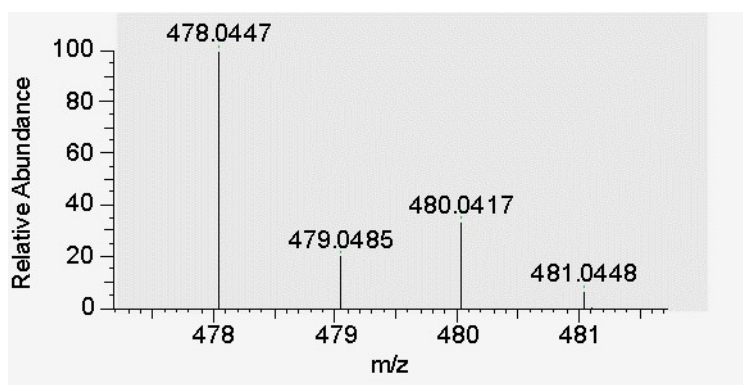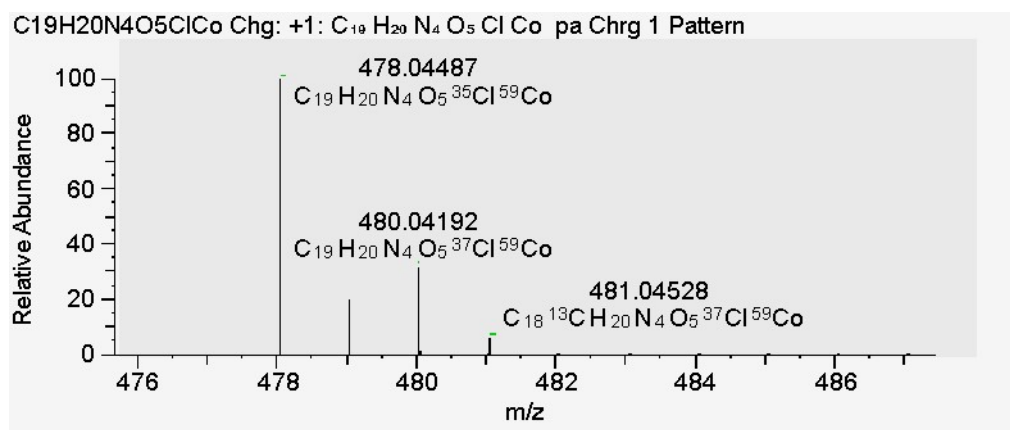

Figure S15. Experimental (top) and simulated (bottom) HR ESI-MS spectrum of 4c



4d

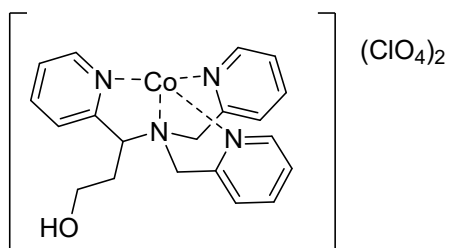

Elemental analysis (%) calcd. for  $\text{C}_{20}\text{H}_{22}\text{N}_4\text{O}_9\text{Cl}_2\text{Co}\cdot 0.33\text{ CH}_3\text{CN}\cdot 1.67\text{ H}_2\text{O}$ : C, 39.03; H, 4.17; N, 9.54. Found: C, 38.60; H, 3.95; N, 9.71.

HRMS (ESI): calcd for  $\text{C}_{20}\text{H}_{22}\text{N}_4\text{O}_5\text{ClCo}$   $[\text{M} - \text{ClO}_4]^+$  492.0605, found 492.0608.

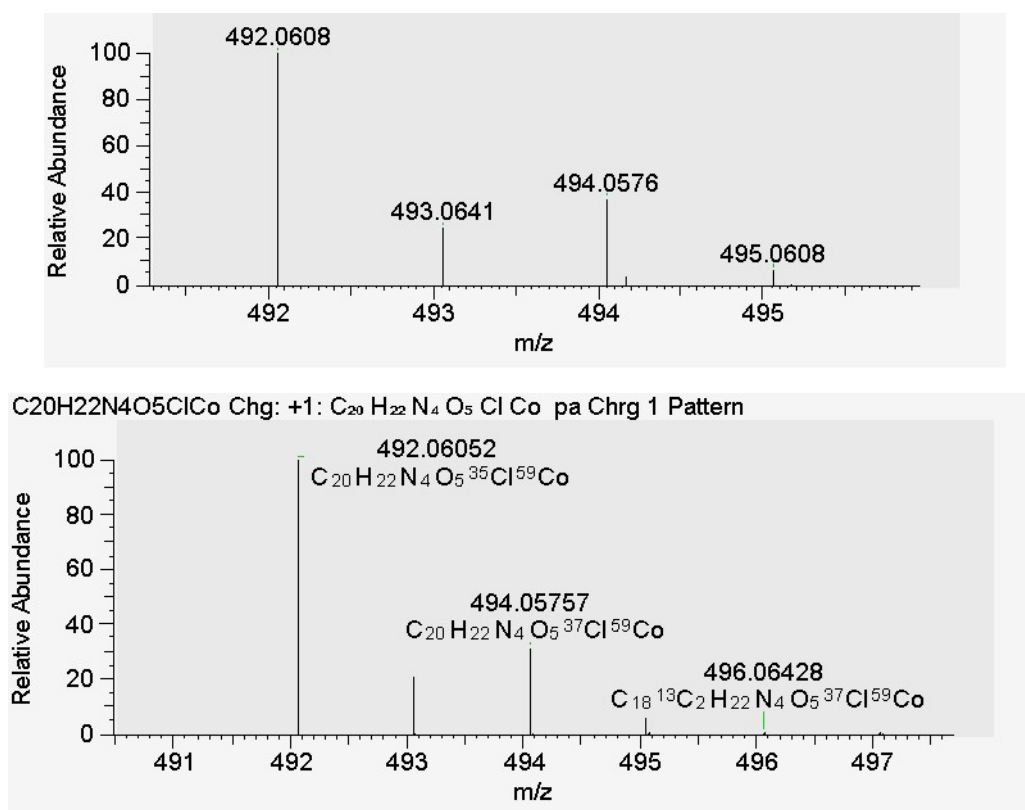

Figure S16. Experimental (top) and simulated (bottom) HR ESI-MS spectrum of 4d

4e

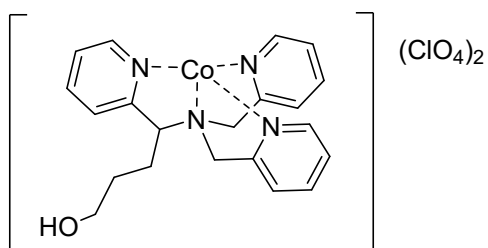

Elemental analysis (%) calcd. for C<sub>21</sub>H<sub>25</sub>N<sub>4</sub>O<sub>5</sub>Cl<sub>2</sub>Co·0.67 CH<sub>3</sub>CN: C, 42.33; H, 4.14; N, 10.32. Found: C, 42.72; H, 4.25; N, 9.81.

HRMS (ESI): calcd for C<sub>21</sub>H<sub>25</sub>N<sub>4</sub>O<sub>5</sub>ClCo [M - ClO<sub>4</sub>]<sup>+</sup> 506.0762, found 506.0759.

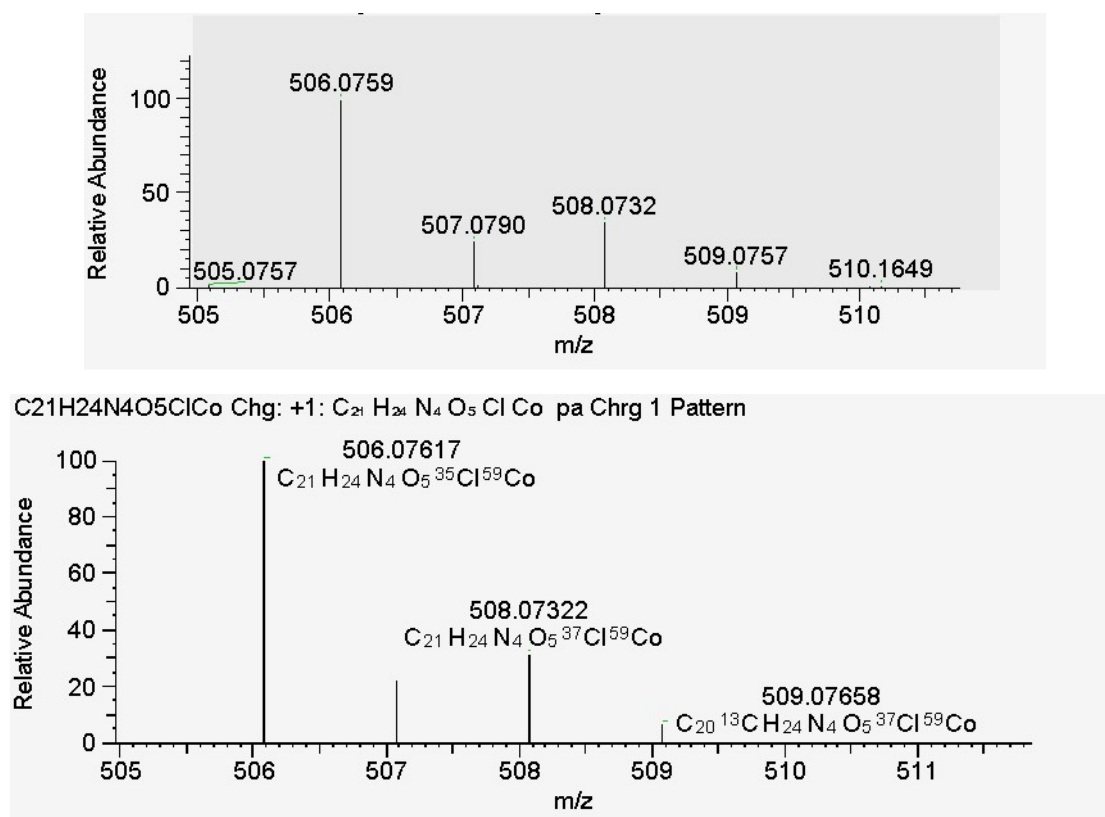

Figure S17. Experimental (top) and simulated (bottom) HR ESI-MS spectrum of 4e

## 5. NMR spectra

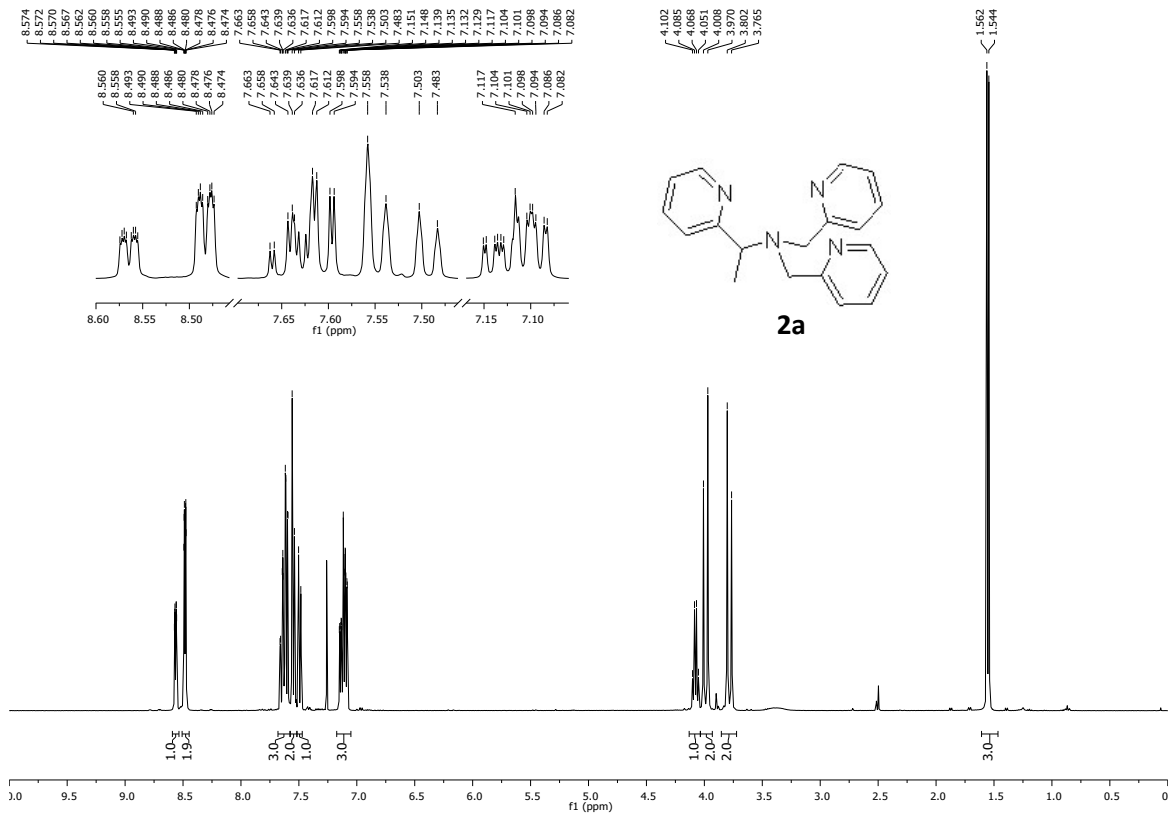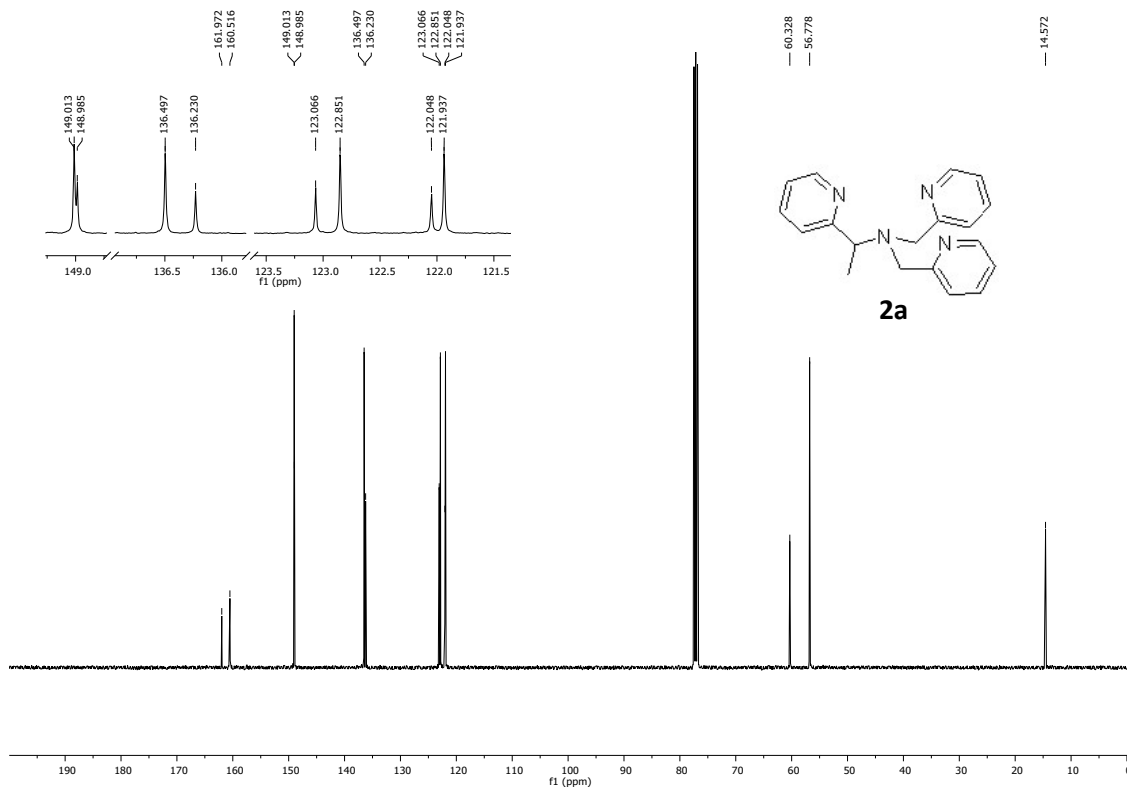

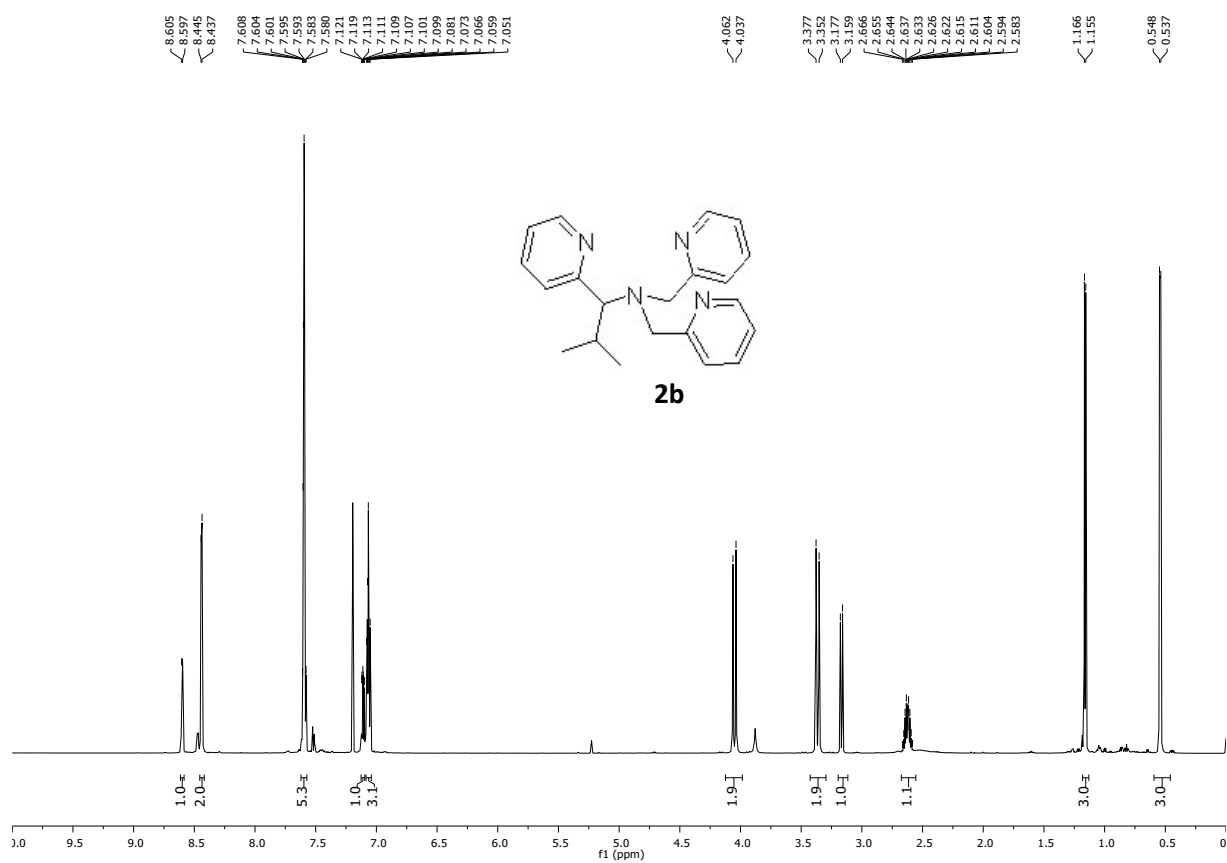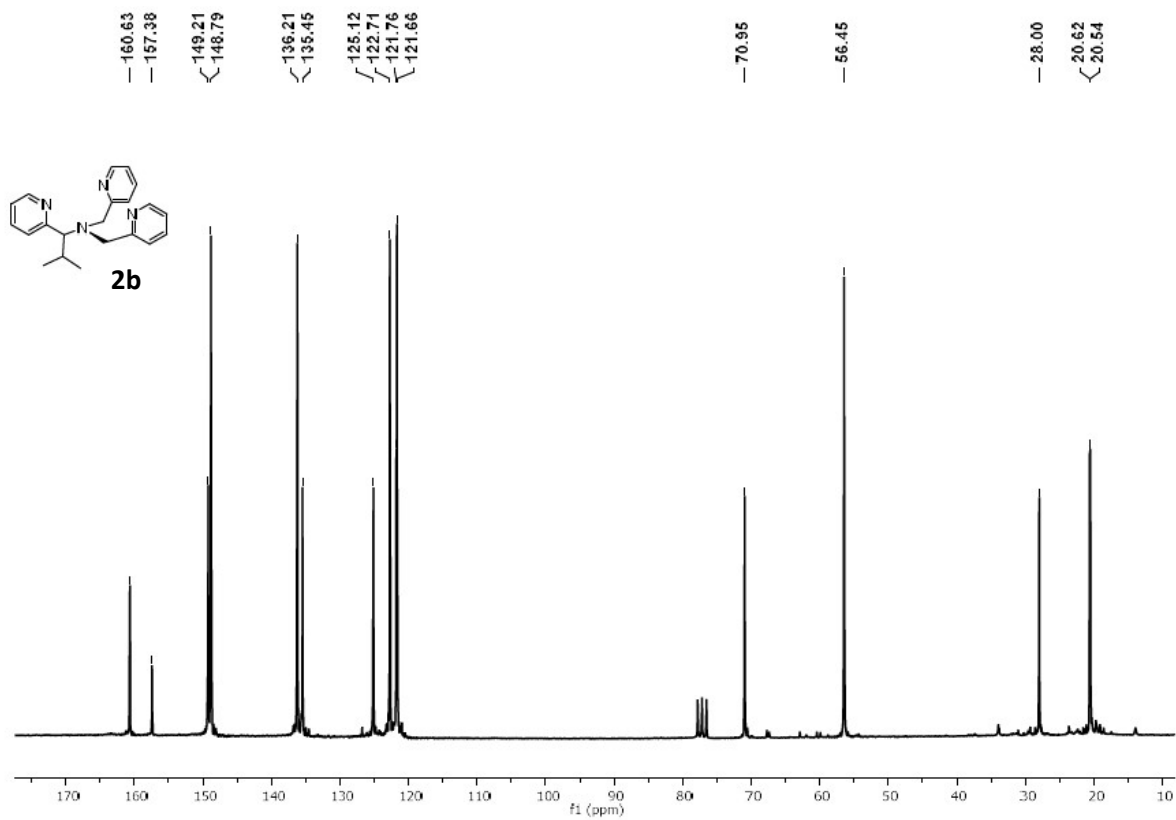

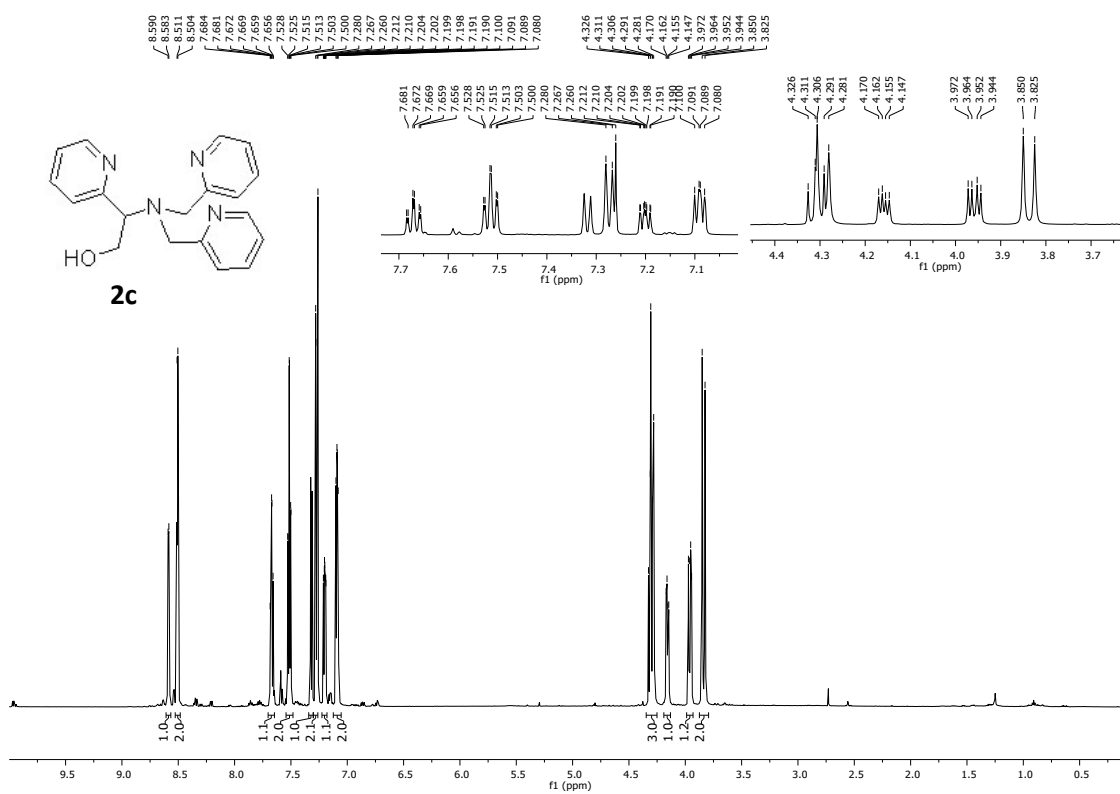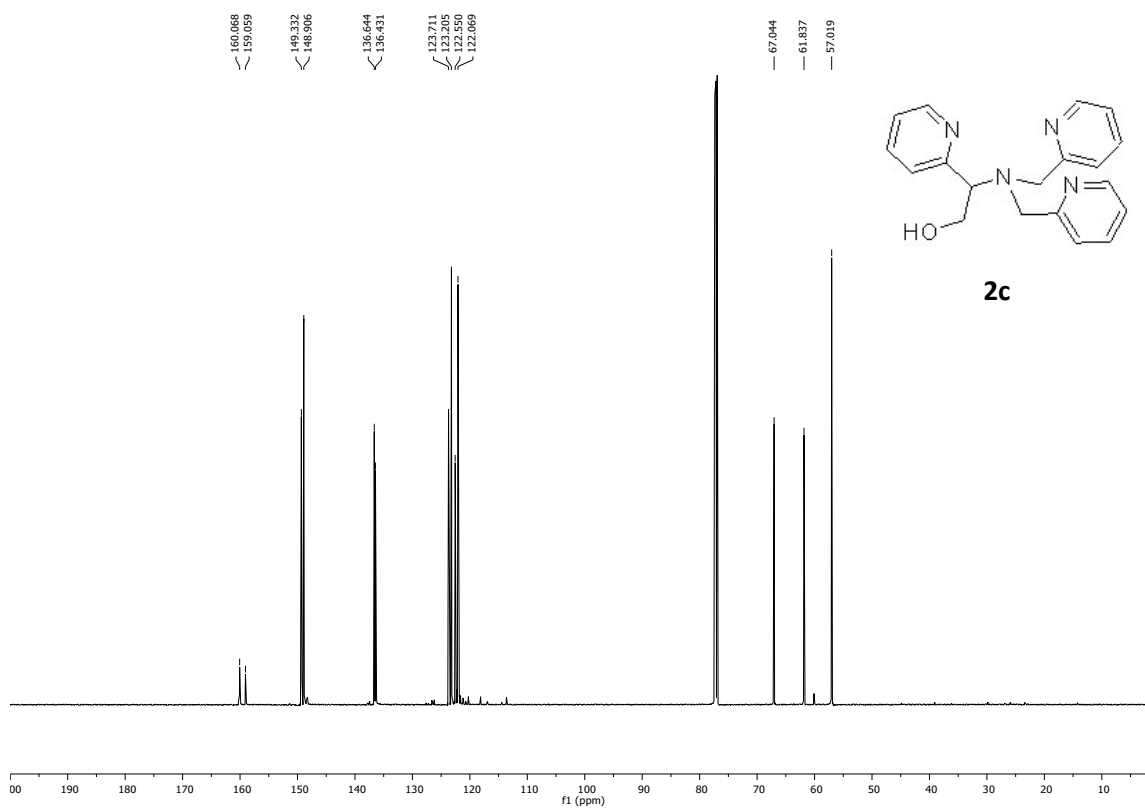



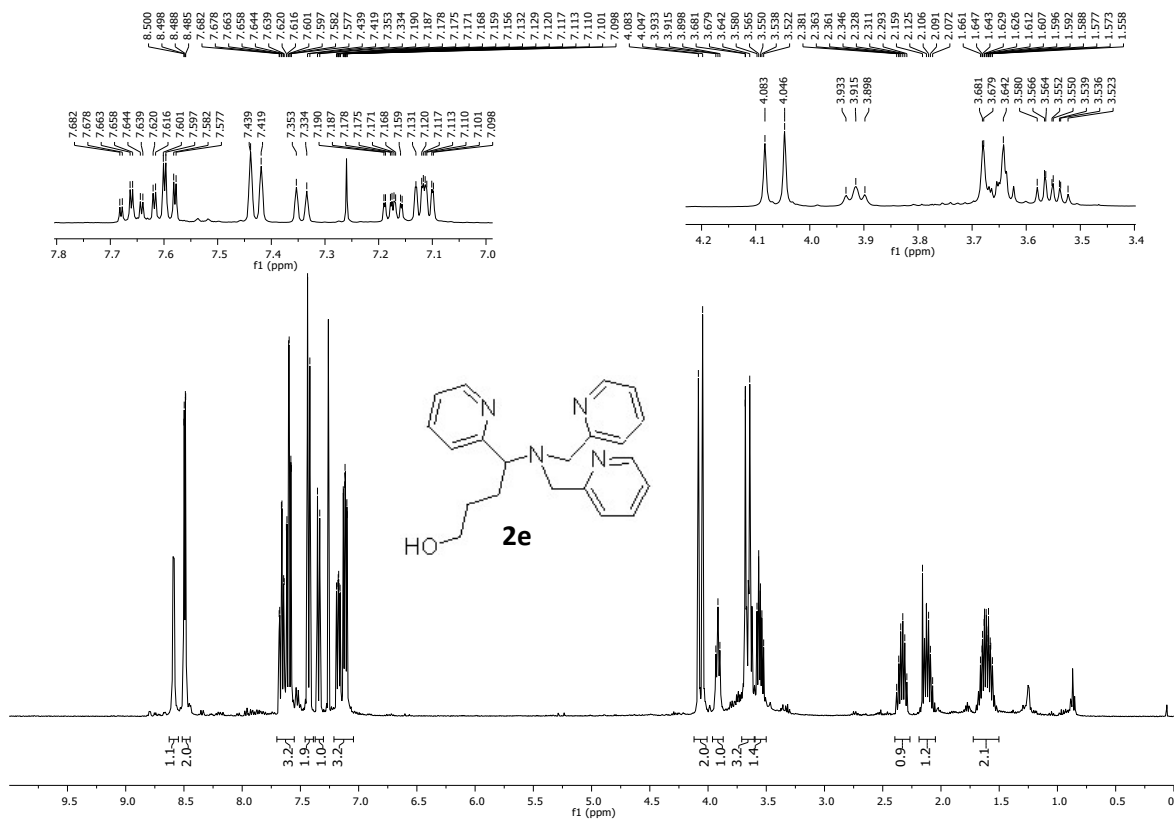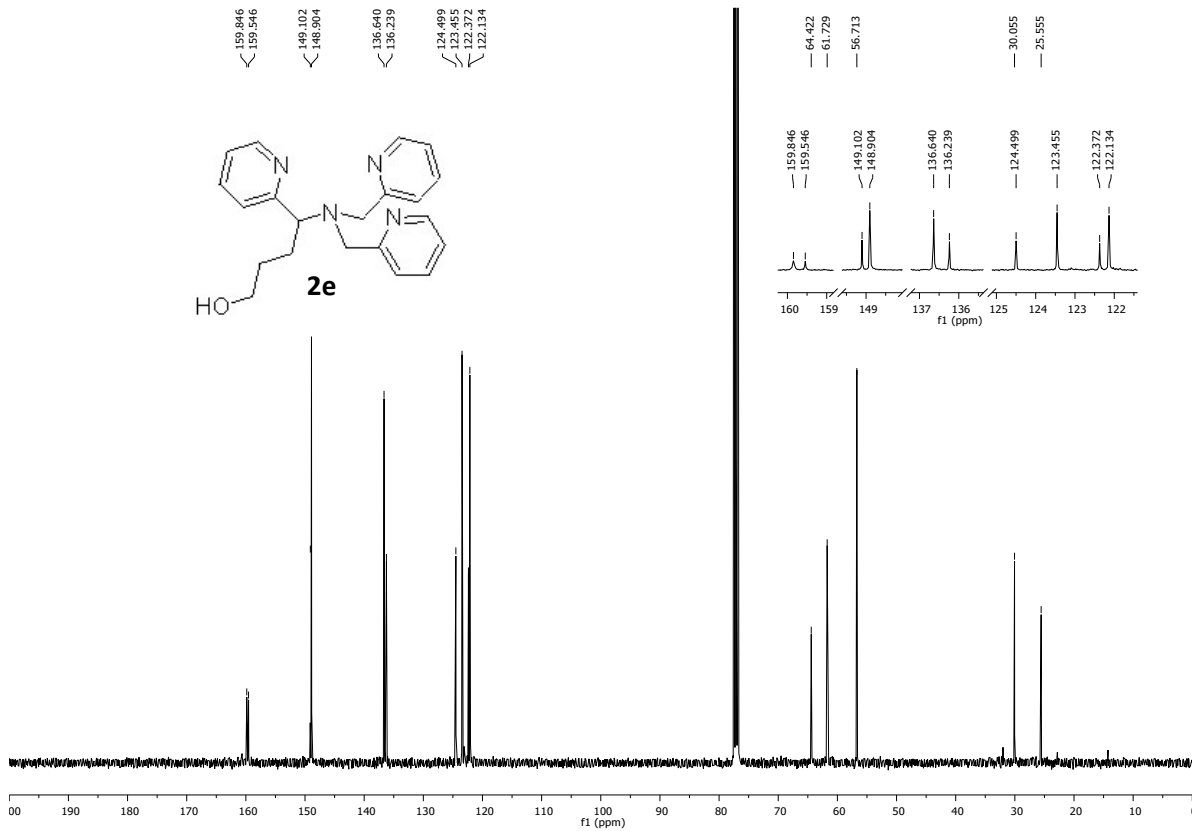

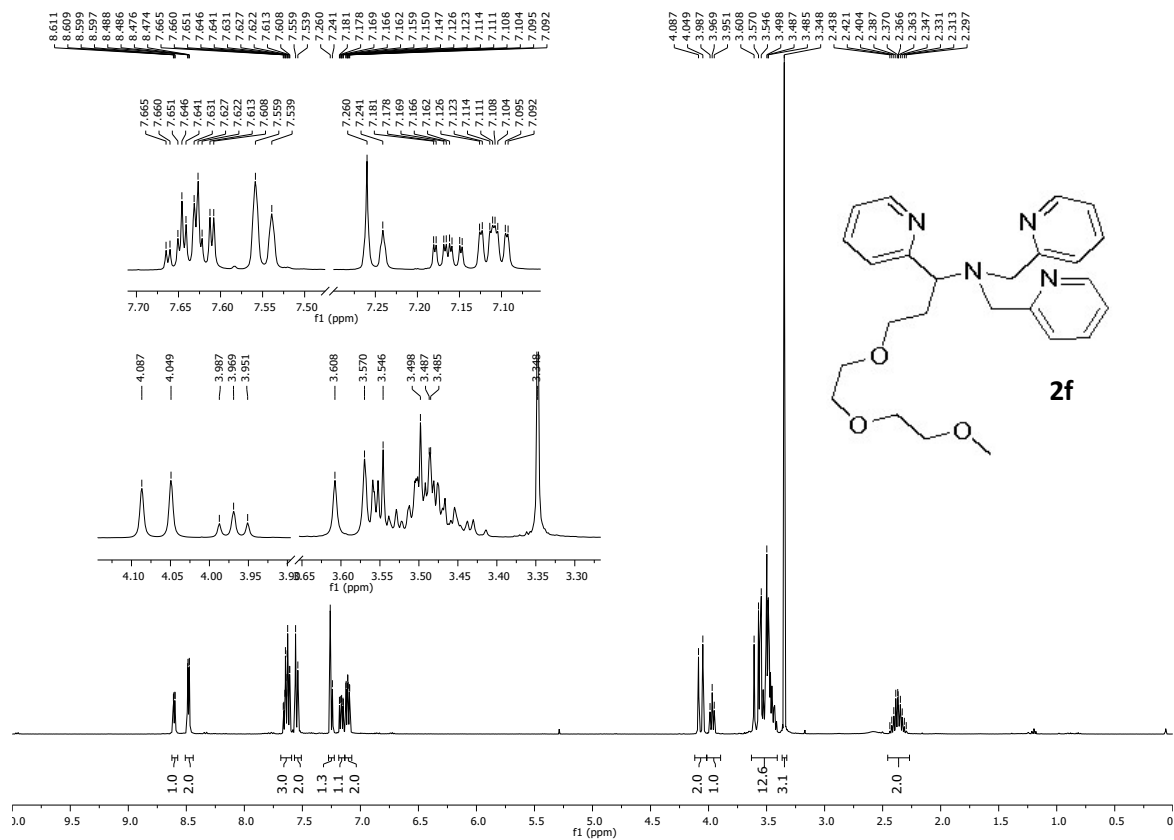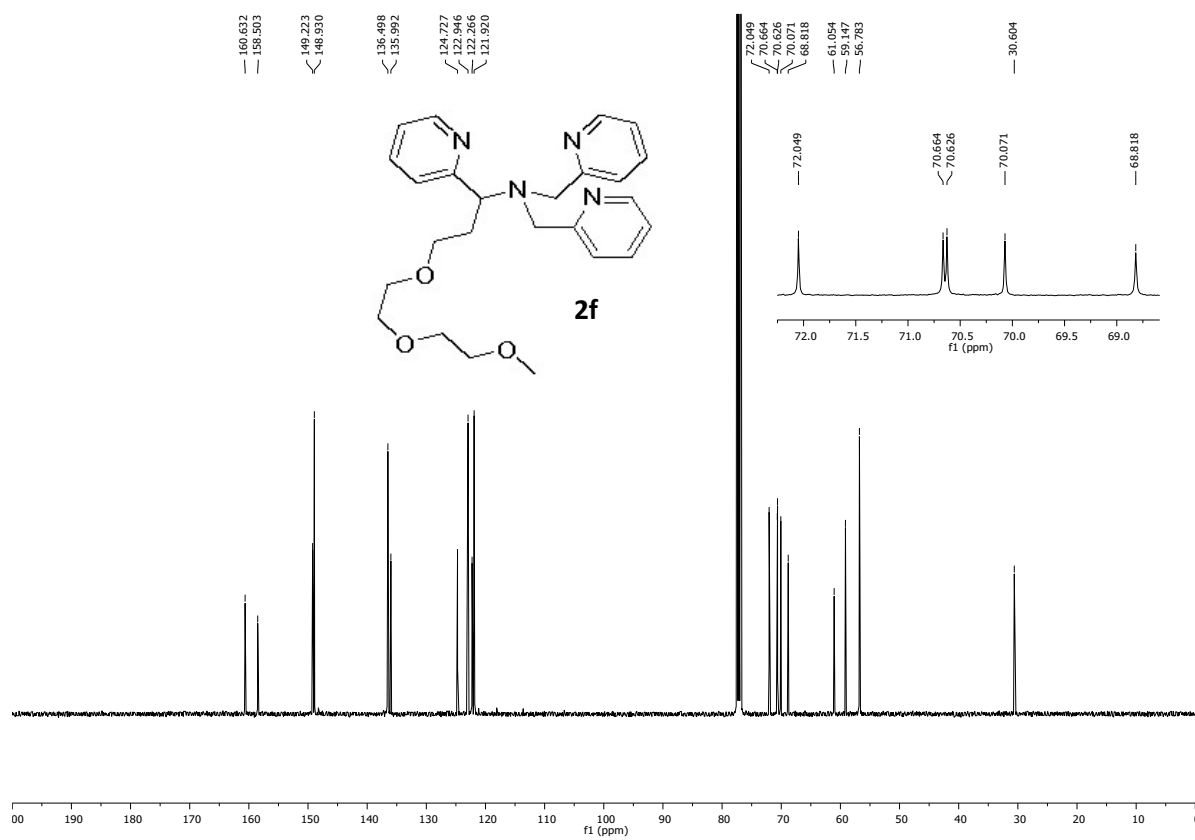



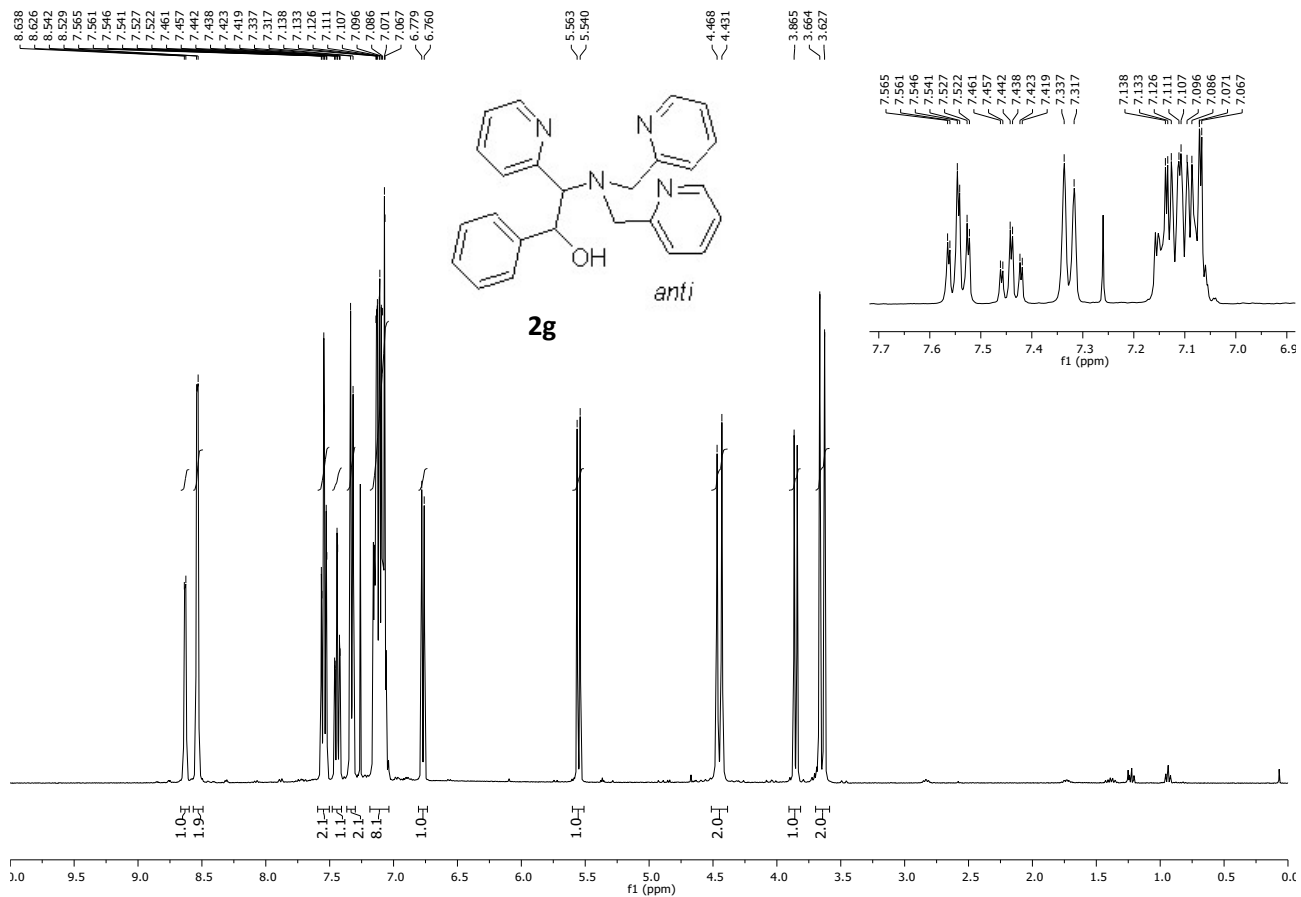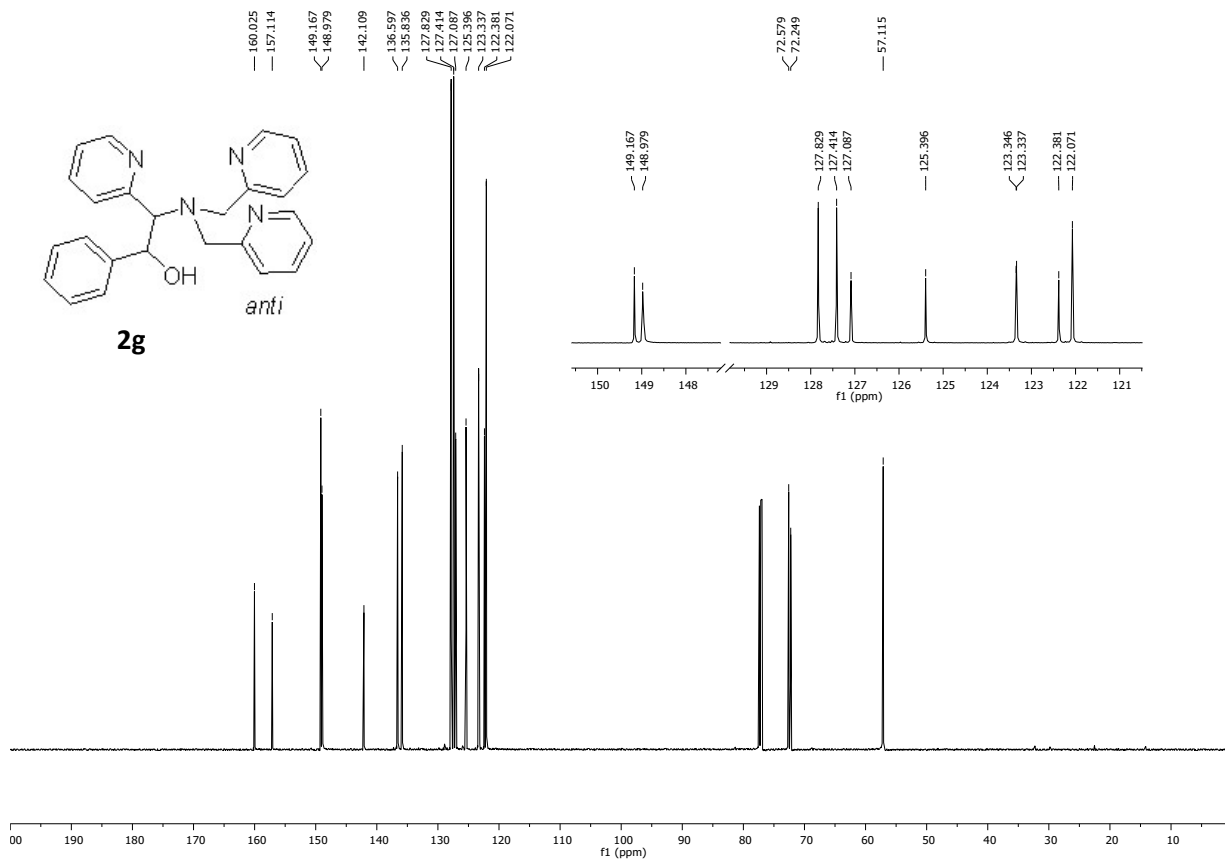

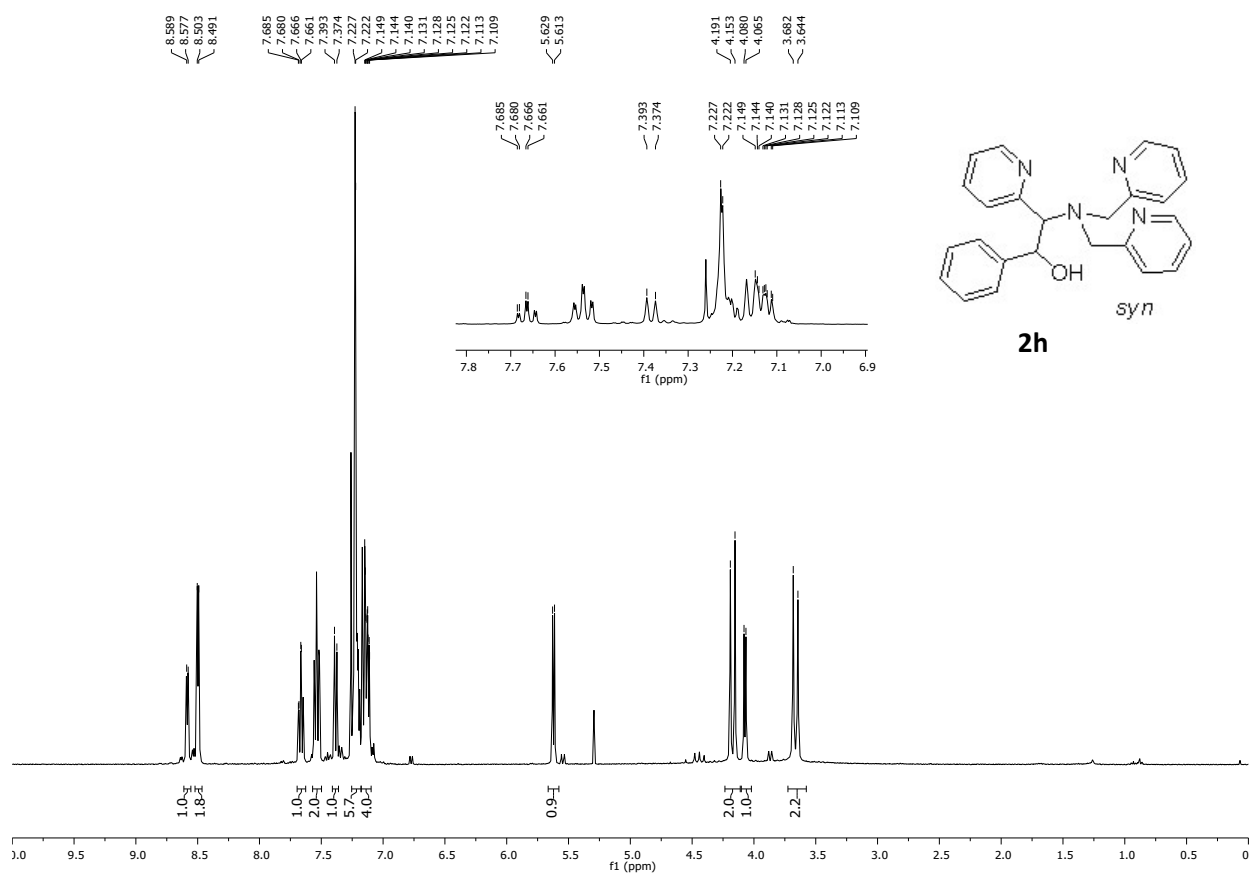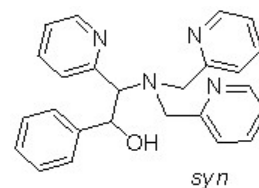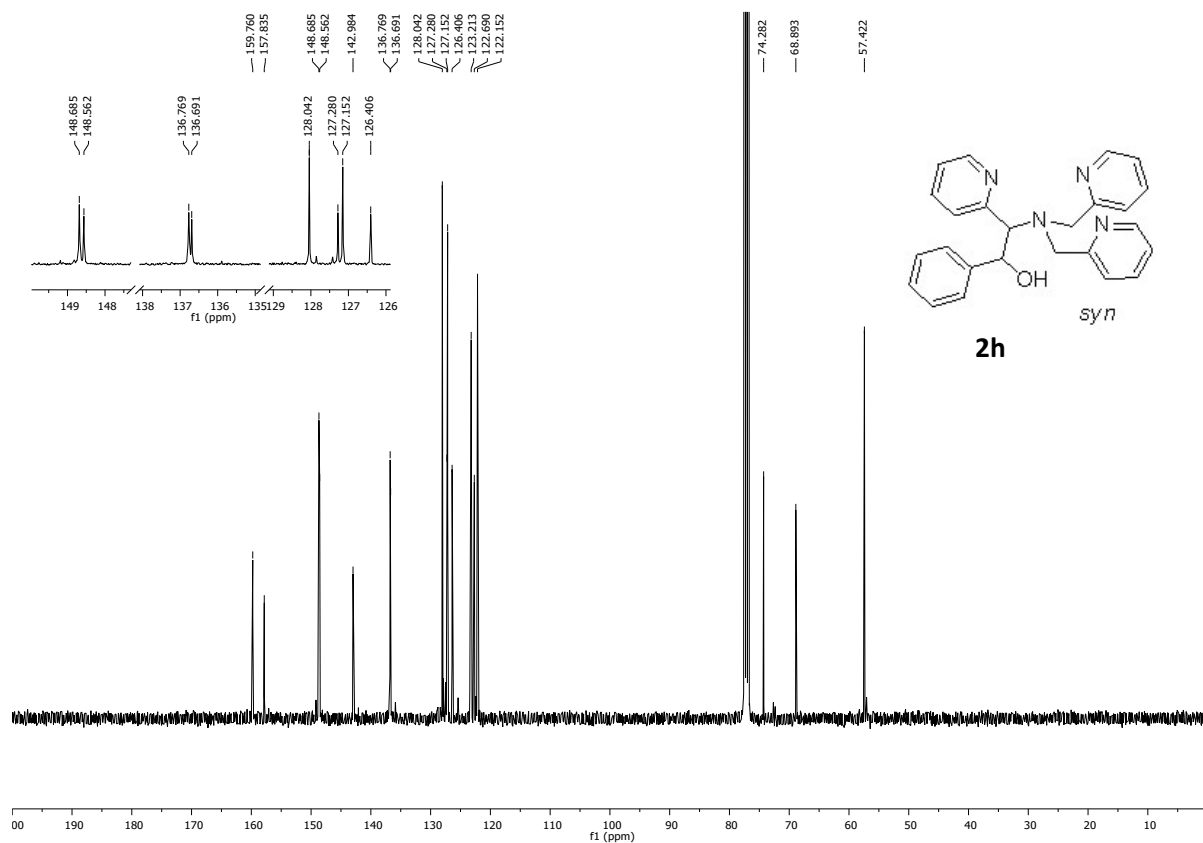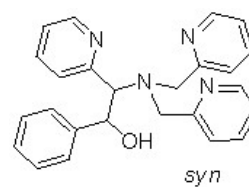

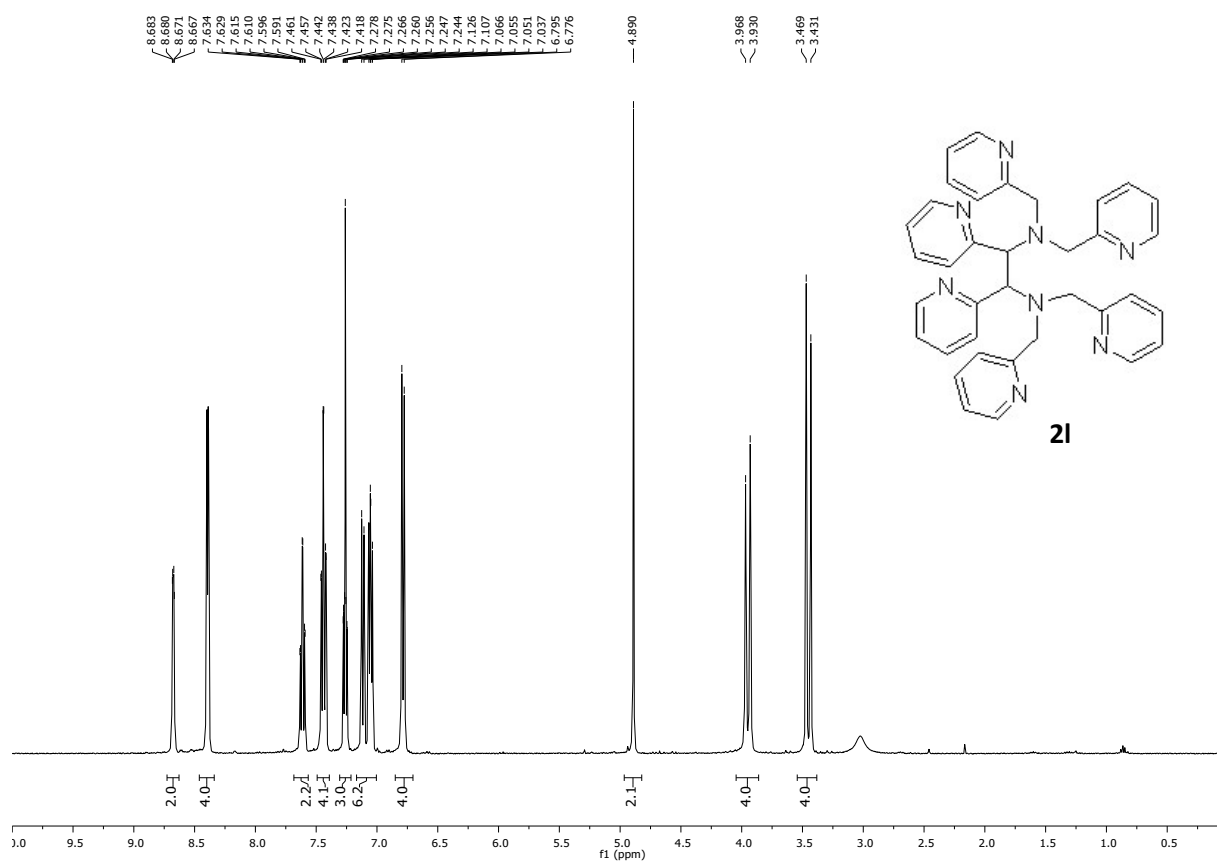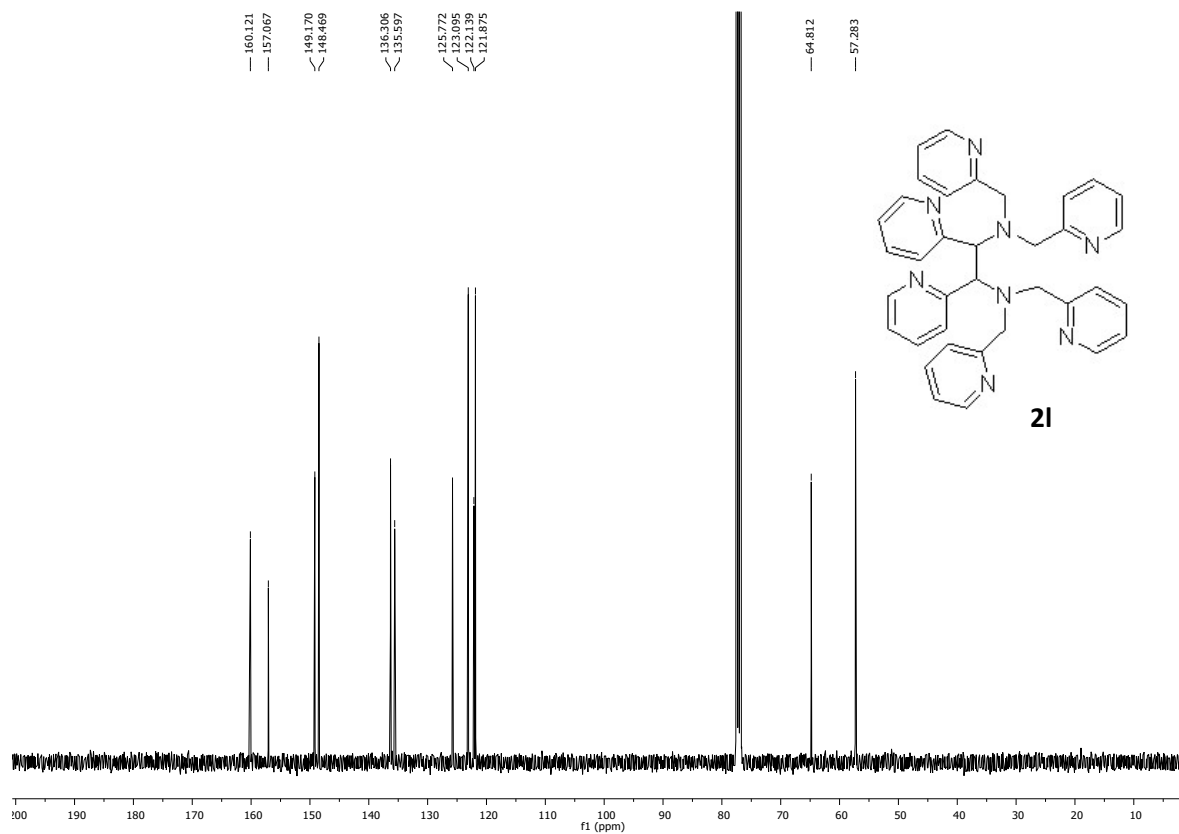





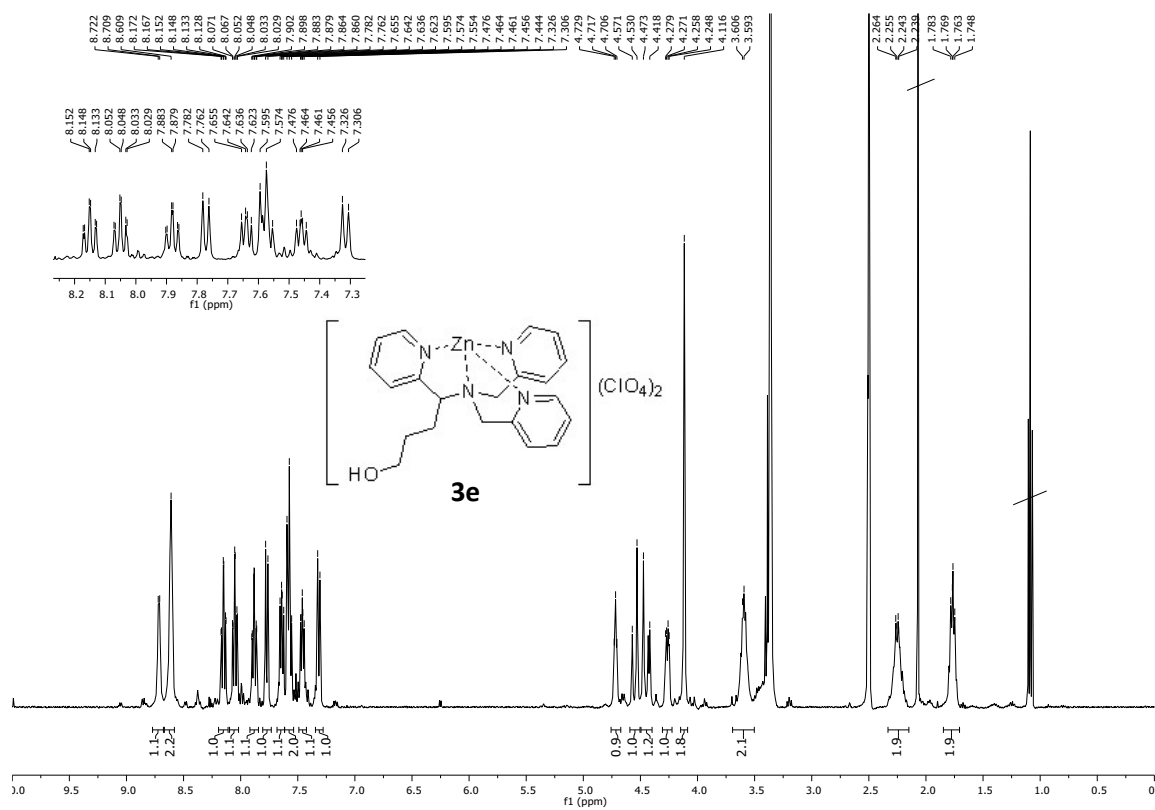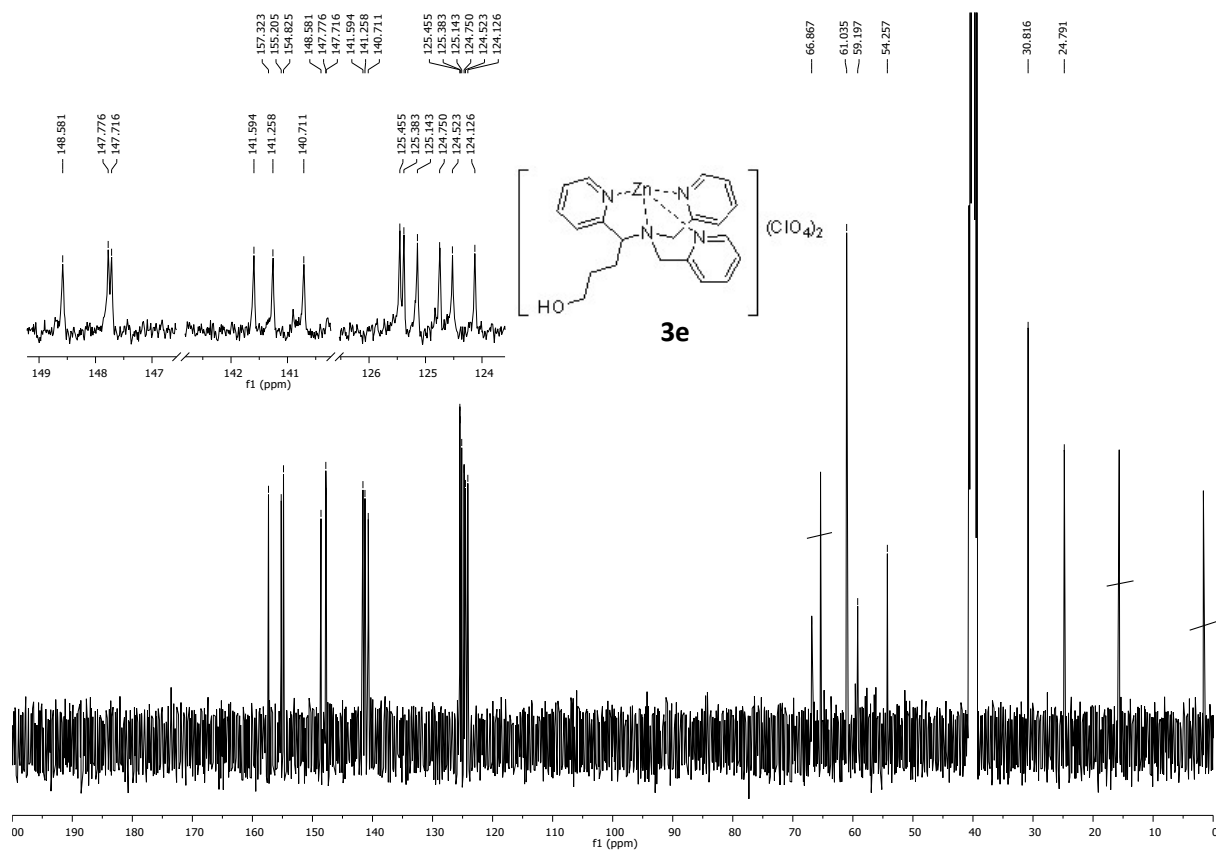

Supplement: d4dt02022g1.pdf [file d4dt02022g1.pdf]
